1  
2  
3  
4  
5  
6  
7  
8

9     **Direct Binding of Phosphatidylglycerol at Specific Sites Modulates**  
10         **Desensitization of a Pentameric Ligand-Gated Ion Channel**

11  
12

13     Ailing Tong<sup>1</sup>, John T. Petroff II<sup>1</sup>, Fong-Fu Hsu<sup>2</sup>, Philipp A. M. Schmidpeter<sup>3</sup>, Crina M. Nimigean<sup>3</sup>,  
14             Liam Sharp<sup>4</sup>, Grace Brannigan<sup>4,5</sup>, Wayland W. L. Cheng<sup>1,\*</sup>

15

16             From the Departments of <sup>1</sup>Anesthesiology, and <sup>2</sup>Internal Medicine, Mass Spectrometry  
17     Resource, Division of Endocrinology, Diabetes, Metabolism, and Lipid Research, Washington  
18     University in St. Louis, MO, USA, <sup>3</sup>Departments of Anesthesiology, and Physiology and  
19     Biophysics, Weill Cornell Medicine, NY, USA, and the <sup>4</sup>Center for Computational and Integrative  
20             Biology and <sup>5</sup>Department of Physics, Rutgers University, Camden, NJ, USA.

21  
22

23     \*To whom correspondence should be addressed: Professor Wayland W. L. Cheng, Department  
24     of Anesthesiology, Washington University School of Medicine, Campus Box 8054, St. Louis, MO  
25             63110. Telephone: (314)273-7958; E-mail: wayland.cheng@wustl.edu

26

## 27 **Abstract**

28 Pentameric ligand-gated ion channels (pLGICs) are essential determinants of synaptic  
29 transmission, and are modulated by specific lipids including anionic phospholipids. The exact  
30 modulatory effect of anionic phospholipids in pLGICs and the mechanism of this effect are not  
31 well understood. Using native mass spectrometry, coarse-grained molecular dynamics  
32 simulations and functional assays, we show that the anionic phospholipid, 1-palmitoyl-2-oleoyl-  
33 phosphatidylglycerol (POPG), preferentially binds to and stabilizes the pLGIC, *Erwinia* ligand-  
34 gated ion channel (ELIC), and decreases ELIC desensitization. Mutations of five arginines located  
35 in the interfacial regions of the transmembrane domain (TMD) reduce POPG binding, and a  
36 subset of these mutations increase ELIC desensitization. In contrast, the L240A mutant known to  
37 decrease ELIC desensitization, increases POPG binding. The results support a mechanism by  
38 which POPG stabilizes the open state of ELIC relative to the desensitized state by direct binding  
39 at specific sites.

40

## 41 **Introduction**

42 Pentameric ligand-gated ion channels (pLGICs) are essential determinants of synaptic  
43 transmission, and the targets of many allosteric modulators including general anesthetics and  
44 anti-epileptics (1). These ion channels are embedded in a heterogeneous and dynamic lipid  
45 environment (2), and the presence of specific lipids fine-tunes the function of pLGICs and may  
46 play a role in regulating neuronal excitability and drug sensitivity (3-5). One nearly ubiquitous  
47 example is that of anionic phospholipids, which are known to modulate pentameric ligand-gated  
48 ion channels (pLGICs) such as the nicotinic acetylcholine receptor (nAChR) (6), as well as inward  
49 rectifying potassium channels (7), K(2P) channels (8), voltage-gated potassium channels (9, 10),  
50 and cyclic nucleotide-gated channels (11). In pLGICs, anionic phospholipids have been shown to  
51 shift the conformational equilibrium of the channel from an uncoupled or desensitized state to a  
52 resting state, in which agonist binding is effectively coupled to channel activation (12-14).

53           Studies of lipid modulation of ion channel function including modulation of pLGICs have  
54 focused on two central questions: 1) what is the exact effect of the lipid on channel function and  
55 structure, and 2) is the effect attributable to direct binding of the lipid at specific sites? *Torpedo*  
56 nAChR channel activity measured from flux assays (6, 15, 16) and agonist-induced conformational  
57 changes (13, 17) depend on anionic phospholipids. However, only a few studies have employed  
58 fast solution changes to measure current responses of pLGICs in model membranes (18), which  
59 is necessary to distinguish the effect of lipids on channel gating, specifically transitions between  
60 resting, open and desensitized states. With regard to lipid binding, early studies using electron  
61 paramagnetic resonance (EPR) of spin-labeled lipids or lipid-induced modification of fluorescent  
62 probes revealed an immobilized layer of lipids surrounding nAChRs that is enriched for certain  
63 phospholipids (19, 20) with lipids occupying specific sites (21, 22). These approaches are,  
64 however, an indirect means to examine lipid binding to ion channels. More recently, crystal  
65 structures of the pLGIC, *Gloeobacter* ligand-gated ion channel (GLIC), revealed bound, co-  
66 purified phospholipids in a putative open structure, and the absence of one of these phospholipids  
67 in a locally-closed structure (23, 24). Similarly, a putative desensitized structure of GLIC with a  
68 bound polyunsaturated fatty acid showed loss of the aforementioned phospholipid density that is  
69 bound to the open state (25). Both of these studies suggest that bound phospholipids at specific  
70 sites stabilize the open state of the channel, although the identity of these lipids remains unknown.  
71 Furthermore, the absence of a lipid density in a crystal structure is not necessarily an indication  
72 of lack of binding.

73           Native mass spectrometry (MS) has proven to be a powerful tool to directly measure  
74 binding of endogenous and exogenous lipids to membrane proteins (26, 27). In addition, coarse-  
75 grained molecular dynamics (MD) simulations provide a complementary approach to examine  
76 lipid interactions with membrane-embedded pLGICs at time scales that allow equilibration of lipid  
77 binding sites (28, 29). We sought to determine whether phospholipids bind directly and selectively  
78 to a pLGIC by native MS and coarse-grained MD simulations, and whether specific binding

79 interactions modulate channel function by measuring ELIC activity in liposomes of defined lipid  
80 composition. Erwinia ligand-gated ion channel (ELIC), a prototypical pLGIC and biochemically  
81 tractable target, is also sensitive to its lipid environment. ELIC was found to be inactive when  
82 reconstituted in 1-palmitoyl-2-oleoyl-phosphatidylcholine (POPC) membranes fused to *Xenopus*  
83 oocyte membranes, similar to the nAChR (30). After optimizing native MS for ELIC, we  
84 demonstrate that phospholipids directly bind to ELIC, with more binding observed for the anionic  
85 phospholipid, 1-palmitoyl-2-oleoyl-phosphatidylglycerol (POPG) compared to zwitterionic  
86 phospholipids, 1-palmitoyl-2-oleoyl-phosphatidylethanolamine (POPE) and POPC. Consistent  
87 with this finding, coarse-grained simulations of ELIC in a lipid bilayer show enrichment of annular  
88 POPG compared to POPC or POPE. In addition, POPG selectively stabilizes ELIC against  
89 thermal denaturation indicative of a specific binding interaction, and reduces channel  
90 desensitization. Mutations of five arginines at the transmembrane domain (TMD) intracellular and  
91 extracellular interfaces decrease POPG binding while a subset of these mutations increase  
92 desensitization. Likewise, the L240A mutant, which reduces desensitization, increases POPG  
93 binding. The results support the hypothesis that anionic phospholipids stabilize the open state of  
94 pLGICs by direct binding to sites in the TMD adjacent to the lipid-facing transmembrane helix 4  
95 (TM4) (3).

96

## 97 **Results**

98

### 99 **Selective binding of phospholipids to ELIC**

100 Native MS of ELIC purified in dodecyl maltoside (DDM) was optimized on a Q-Exactive  
101 EMR mass spectrometer as previously described (27). Optimal desolvation of the pentamer  
102 required activation energies that resulted in some dissociation into tetramer and monomer (Fig.  
103 1A). Nevertheless, both the pentamer and tetramer species showed multiple bound small  
104 molecules of ~750 Da, likely corresponding to co-purified phospholipids (up to 8 and 6 lipids per  
105 multimer were observed for the pentamer and tetramer, respectively) (Fig. 1A). To determine the

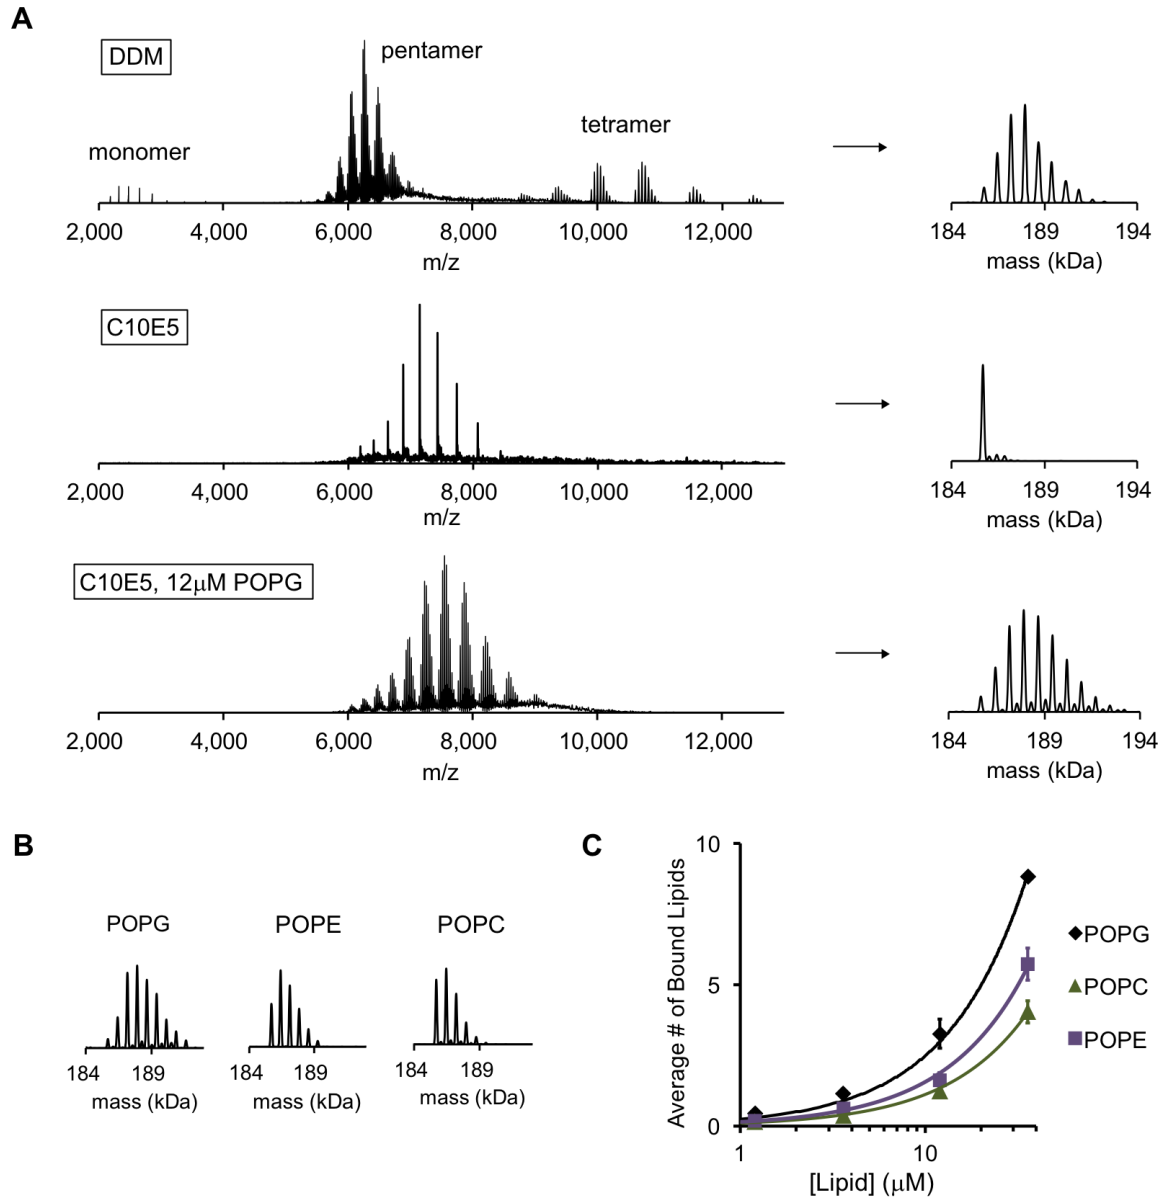

**Figure 1.** POPG binds selectively to ELIC. **(A)** Native MS spectra of ELIC in DDM, C10E5, and C10E5 with 12  $\mu\text{M}$  POPG. *Left* shows full spectra and *right* shows deconvoluted spectra. **(B)** Deconvoluted spectra of ELIC in 12  $\mu\text{M}$  of the indicated phospholipid. **(C)** Plot of the average number of bound phospholipids per pentamer at varying concentrations of POPG, POPE and POPE ( $n=3-6$ ,  $\pm\text{SD}$ ).

106 identity of these lipids, we performed a lipid extraction from the purified ELIC preparation, and  
107 analyzed the sample using tandem MS. This revealed multiple PE and PG phospholipids with

108 different acyl chains that mirror the phospholipids extracted from *E. coli* membranes  
109 (Supplementary Table 1). Quantification of the MS intensities for PG relative to PE species yielded  
110 a higher relative abundance of PG co-purified with ELIC compared to *E. coli* membranes,  
111 suggesting that ELIC preferentially binds PG in its native environment (Supplementary Fig. 1,  
112 Supplementary Table 1).

113 To examine direct binding of exogenous phospholipids to ELIC, we performed a detergent  
114 screen to delipidate ELIC focusing on detergents that are also superior for native MS  
115 measurements (31). The polyethylene glycol-based detergent, C10E5, proved best for this  
116 application, yielding a stable, delipidated pentamer by native MS with lower charge states and no  
117 dissociation of the pentamer (Fig. 1A). This observation is consistent with previous reports in other  
118 membrane proteins (31, 32). Addition of varying concentrations of the anionic phospholipid,  
119 POPG, to 1  $\mu\text{M}$  ELIC showed concentration dependent binding (Supplementary Fig. 2). We  
120 quantified this binding by calculating the average number of bound phospholipids at each  
121 concentration. For example, at 12  $\mu\text{M}$  POPG, native MS spectra revealed up to 9 bound POPG  
122 per pentamer or an average of 2.9 POPG per pentamer (Fig. 1B and 1C). The average number  
123 of bound POPG was equivalent for most charge states, and decreased modestly at charge states  
124 higher than +26 likely due to electrostatic repulsion within the ELIC-POPG complexes  
125 (Supplementary Fig. 3); therefore, deconvolution was performed for charge states +26 and lower.  
126 Less binding was observed for the neutral phospholipids, POPE and POPC (Fig. 1B and 1C),  
127 indicating that the anionic phospholipid, POPG, either binds with higher affinity or at more sites.

128 To further examine phospholipid interactions with ELIC using a molecular model, we  
129 performed coarse-grained MD simulations on binary POPG/POPC and POPG/POPE model  
130 membranes containing a single ELIC pentamer (Fig. 2A). Unlike fully-atomistic simulations,  
131 coarse-grained simulations permit significant diffusion of lipids over simulation time scales. The  
132 boundary lipid composition can thus equilibrate over the simulation time, even if it varies

133 significantly from the bulk membrane composition. The POPG fraction was varied between 0 and  
134 70%. Enrichment or depletion of POPG among boundary lipids for each concentration was  
135 quantified using the boundary lipid metric B (Equation 7, see Methods). For a given lipid species,  
136  $B > 0$  reflects enrichment,  $B < 0$  reflects depletion, and  $B = 0$  reflects random mixing. For POPG,  $B > 0$   
137 for all compositions tested (Fig. 2B). This result indicates that if POPG is present in the membrane,  
138 it is enriched among boundary lipids. This enrichment is strongest for lower amounts of POPG  
139 (i.e. lower  $x_{PG}$ ), consistent with specific binding of POPG to ELIC.

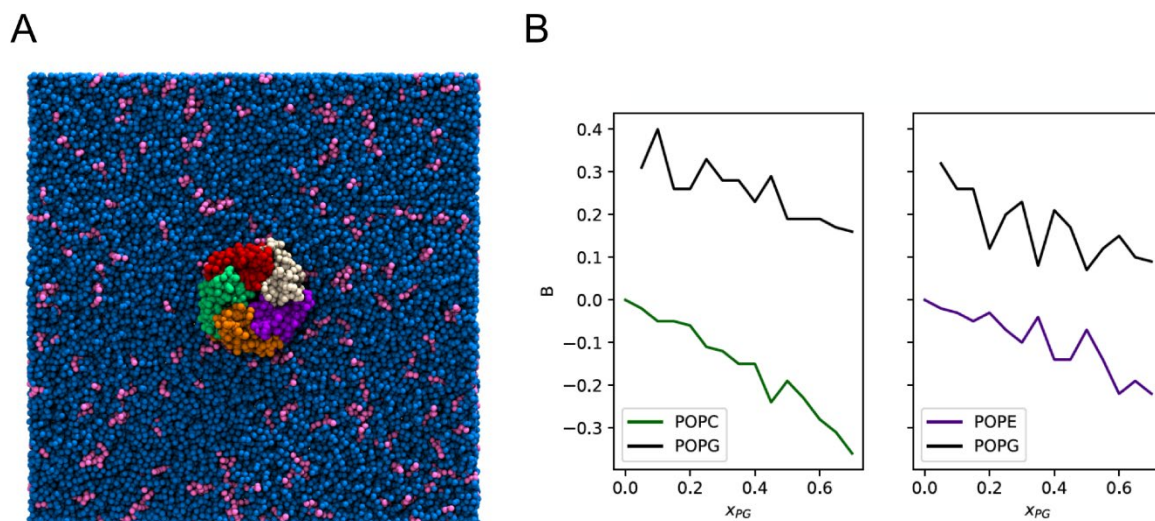

**Figure 2.** Enrichment of POPG among ELIC boundary phospholipids from coarse-grained simulations. **(A)** Image of the simulation model of ELIC embedded in a membrane consisting of 10% POPG (pink) and 90% POPC (blue). The view is from the extracellular side of ELIC perpendicular to the membrane. **(B)** The boundary enrichment metric, B, is shown for phospholipid species in POPC/POPG membranes (left) or POPE/POPG membranes (right) over a range of POPG mole fractions ( $x_{PG}$ ). B is defined in Equation 7 (see Methods) and reflects the fractional difference between the amount of a lipid species found in the boundary and the bulk membrane:  $B > 0$  indicates enrichment,  $B < 0$  indicates depletion, and  $B = 0$  indicates no difference in mole fraction between the bulk and the boundary.

140 The average number of boundary phospholipids was  $31.6 \pm 2.5$  ( $\pm$ SD) across all  
141 compositions, and the total did not vary systematically with membrane composition. Therefore,  
142 we assumed that the stoichiometries of binding for these phospholipids to ELIC are similar, and  
143 fit the native MS binding data for each phospholipid to a binomial distribution binding model with  
144 32 binding sites of equivalent affinity (see Methods). While this is an oversimplification of  
145 phospholipid binding to ELIC in a membrane, it provides a reasonable approximation to the MS  
146 data, and reveals that POPG binds to ELIC with  $\sim 1.9x$  and  $2.8x$  higher affinity than POPE and  
147 POPC, respectively (Supplementary Fig. 4). Overall, we conclude that POPG binds to ELIC with  
148 higher affinity than POPE or POPC, resulting in POPG enrichment of annular phospholipids as  
149 seen in the coarse-grained MD simulations.

150

#### 151 **Selective effect of POPG on ELIC stability and function**

152 To determine the effect of POPG binding on ELIC, we first tested the stability of purified,  
153 delipidated ELIC in C10E5 against thermal denaturation in the absence and presence of POPG  
154 (33). ELIC was heated to a temperature that resulted in 85% decrease in the amplitude of the  
155 pentamer peak as assessed by size exclusion chromatography (32 °C for 15 min). POPG  
156 significantly increased the thermal stability of 1  $\mu$ M ELIC with an  $EC_{50}$  (concentration of POPG for  
157 50% effect) of 52  $\mu$ M (Fig. 3A). The thermal stabilizing effect of a phospholipid was defined as the  
158 ratio of the pentamer peak height after heating with lipid versus no lipid. In contrast, POPE and  
159 POPC had no effect on ELIC stability (Fig. 3A), indicating that POPG binding selectively stabilizes  
160 the structure of ELIC. Having performed our POPG binding experiment and thermal stability assay  
161 under the same conditions, it is possible to relate the average number of bound POPG to its  
162 stabilizing effect. 36  $\mu$ M POPG was the highest concentration for which the average number of  
163 bound POPG could be determined due to the overlapping of charge states from lipid-bound  
164 species (Fig. 1A, Supplementary Fig. 2). Although POPG binding does not approach saturation



165 at this concentration, extrapolation of POPG binding and relating this extrapolation to the thermal  
166 stabilizing effect provides an approximation of the number of bound POPG needed to stabilize  
167 ELIC against thermal denaturation. Supplementary Figure 5 shows a relationship between the  
168 number of bound POPG and the stabilizing effect, which was derived by equating the POPG  
169 concentration from the functions of POPG binding (Fig. 1C) and thermal stability data (Fig. 3A).  
170 The relationship estimates that 32 POPG (number of annular lipids in ELIC from MD simulations)  
171 yields ~82% of the thermal stabilizing effect (Supplementary Fig. 5).

172 Next, we assessed the effect of POPG on ELIC function by reconstituting the channel in  
173 giant liposomes. Optimal formation of giant liposomes was achieved using a 2:1:1 ratio of  
174 POPC:POPE:POPG (i.e. 25 mole% POPG). In this lipid membrane composition, robust ELIC  
175 currents were elicited with excised patch-clamp recordings using the agonist, cysteamine, with a  
176 peak dose response  $EC_{50}$  of 5.1 mM (Fig. 3B, Table 1, Supplementary Fig. 6A). Patch-clamp  
177 recordings were performed with 0.5 mM  $BaCl_2$  in the pipette and bath, which is predicted to result  
178 in an increase in the  $EC_{50}$  of cysteamine response (34). Near saturating currents were achieved  
179 at 30 mM cysteamine at which ELIC activated and desensitized with time constants of 134 ms  
180 and 1.9 s, respectively (Fig. 3C and 3D, Table 1, Supplementary Fig. 6B). These values are  
181 comparable to previous reports of outside-out patch-clamp recordings in HEK cells or oocytes  
182 (35, 36). ELIC desensitization showed complex kinetics where the majority of recordings were  
183 best fit with a double exponential and some by a single exponential. To combine data from all  
184 traces, weighted average time constants from double exponential fits were averaged with time  
185 constants from single exponential fits. The extent of desensitization was examined by measuring  
186 currents after 20 s of cysteamine application. To examine the effect of POPG on ELIC gating,  
187 excised patch-clamp recordings were performed in liposomes containing 12%, 25%, and 40%  
188 POPG. Increasing the mole% of POPG had no significant effect on cysteamine  $EC_{50}$  values or  
189 activation kinetics (Fig. 3B, Table 1, Supplementary Fig. 6), but reduced the rate and extent of  
190 desensitization (Fig. 3C and 3D, Table 1).

191 To examine ELIC activity in the absence of POPG, a fluorescence-based stopped-flow  
 192 flux assay was performed (37). ELIC was reconstituted into either POPC-alone or 2:1:1  
 193 POPC:POPE:POPG liposomes encapsulating the fluorophore ANTS (8-Aminonaphthalene-  
 194 1,3,6-Trisulfonic acid). In a first mixing step, liposomes were incubated with 5 mM cysteamine to

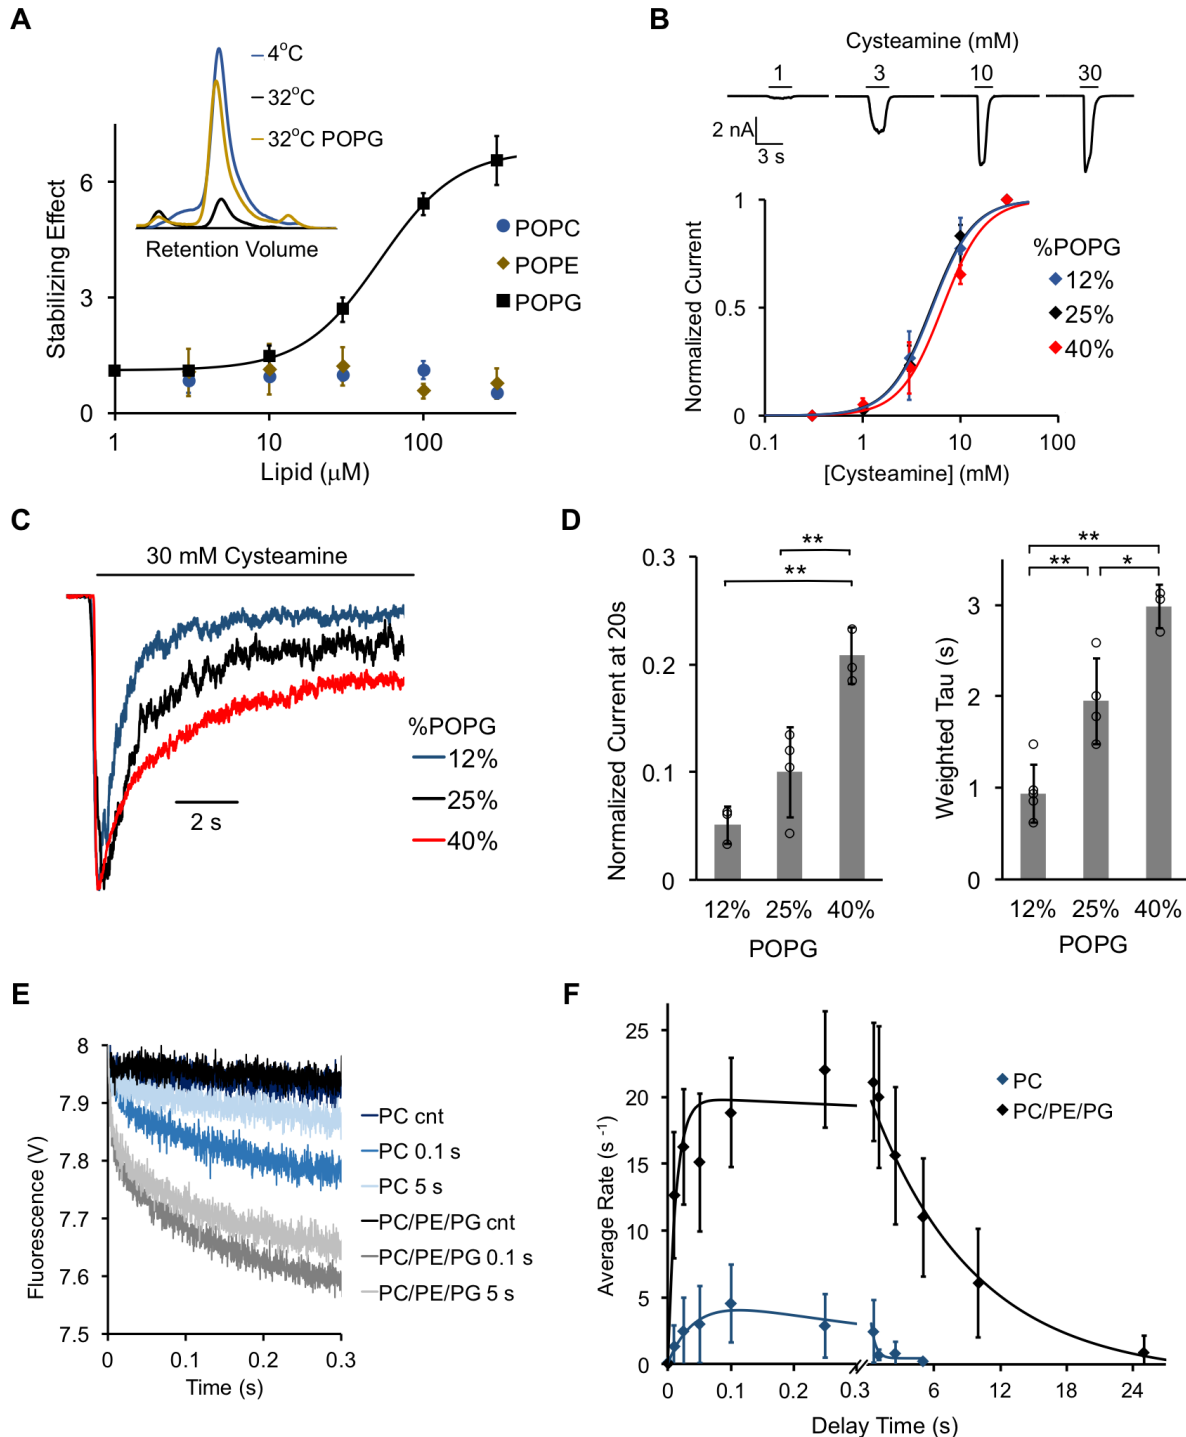

**Figure 3.** POPG selectively thermally stabilizes ELIC and decreases ELIC desensitization. **(A)** Plot of stabilizing effect (defined as the ELIC pentamer peak height with phospholipid relative to control after heating) versus phospholipid concentration ( $n=3$ ,  $\pm$ SD;  $EC_{50} = 52 \mu\text{M}$ , Hill  $n = 1.7$ ). Inset shows size exclusion chromatography (SEC) profile in absorbance units of the ELIC pentamer treated at  $4^\circ\text{C}$ ,  $32^\circ\text{C}$ , and  $32^\circ\text{C}$  with  $100 \mu\text{M}$  POPG. **(B) Top:** Representative ELIC current responses to  $30 \text{ mM}$  cysteamine in  $25 \text{ mole}\%$  POPG liposomes. **Bottom:** Normalized plots of peak current responses of ELIC to cysteamine in giant liposomes with varying mole% POPG ( $n=3-5$ ,  $\pm$ SD). Data are fit to Hill equation with  $n=2$ . **(C)** Representative ELIC currents in response to  $30 \text{ mM}$  cysteamine in liposomes with varying mole% POPG. **(D) Left:** ELIC currents  $20 \text{ s}$  after application of  $30 \text{ mM}$  cysteamine normalized to peak response at varying mole% POPG ( $n=4-5$ ,  $\pm$ SD,  $**p<0.01$ ). **Right:** Weighted tau (time constants) of ELIC desensitization at varying mole% POPG ( $n=3-5$ ,  $\pm$ SD,  $**p<0.01$ ,  $*p<0.05$ ). **(E)** Representative fluorescence-quench time courses from sequential mixing stopped-flow experiments of ELIC in POPC liposomes or  $2:1:1$  POPC:POPE:POPG liposomes. Proteoliposomes were mixed with no cysteamine (cnt) or  $5 \text{ mM}$  cysteamine with a  $0.1$  or  $5 \text{ s}$  delay prior to mixing with  $\text{TI}^+$ . Note that the control traces are superimposed. **(F)** Rate constants extracted from quench kinetics as shown in (E) as a function of the incubation time with cysteamine. Data are fit with a double exponential yielding activation and desensitization time constants ( $n=3$ ,  $\pm$ SD).

195 activate the channel for different amounts of time ( $10 \text{ ms}$  to  $25 \text{ s}$ ) after which a second mixing  
196 step was performed with  $\text{TI}^+$  containing buffer.  $\text{TI}^+$  can permeate through activated channels into  
197 the liposomes where it quenches ANTS fluorescence. The quenching kinetics are a measure of  
198 the channel activity upon cysteamine exposure for defined incubation times (Fig. 3E). In POPC  
199 liposomes, ELIC showed less cysteamine-elicited ion flux compared to ELIC in  
200 POPC:POPE:POPG liposomes (Fig. 3E and 3F, Table 2), as estimated from the overall rate of  
201  $\text{TI}^+$  flux. The rate of activation was modestly faster in POPC:POPE:POPG liposomes compared

202 to POPC (Fig. 3F, Table 2). More strikingly, the rate of desensitization was more than 20-fold  
 203 faster in POPC liposomes, leading to a decrease in the lifetime of the open state (Fig. 3E and 3F,  
 204 Table 2).

205 In summary, POPG selectively increases the thermal stability of ELIC, and modulates  
 206 channel activity by stabilizing the open relative to the desensitized state. We hypothesize that  
 207 POPG decreases receptor desensitization by direct binding at specific sites.

|      | Desensitization     |                     | Activation  | Dose Response                    |
|------|---------------------|---------------------|-------------|----------------------------------|
| POPG | Weighted $\tau$ (s) | Norm Current at 20s | $\tau$ (ms) | EC <sub>50</sub> (mM cysteamine) |
| 12%  | 0.93 ± 0.32         | 0.05 ± 0.02         | 112 ± 29    | 5.3 ± 1.0                        |
| 25%  | 1.95 ± 0.47         | 0.10 ± 0.04         | 134 ± 50    | 5.1 ± 1.2                        |
| 40%  | 2.98 ± 0.24         | 0.21 ± 0.03         | 133 ± 66    | 6.5 ± 1.3                        |

208

**Table 1:** ELIC WT channel properties in giant liposomes composed of varying mole% POPG (n=3-5, ±SD). The rate and extent of desensitization are reported as weighted time constants ( $\tau$ ), and the current after 20 s of 30 mM cysteamine application normalized to peak response. Also shown are activation time constants ( $\tau$ ) in response to 30 mM cysteamine and EC<sub>50</sub>s for cysteamine activation.

|                        | Activation Rate Constant | Desensitization Rate Constant |
|------------------------|--------------------------|-------------------------------|
| POPC                   | 24 ± 8 s <sup>-1</sup>   | 2.4 ± 0.08 s <sup>-1</sup>    |
| POPC:POPE:POPG (2:1:1) | 75 ± 22 s <sup>-1</sup>  | 0.11 ± 0.04 s <sup>-1</sup>   |

**Table 2:** ELIC WT activation and desensitization rate constants derived from a double exponential fit to the time course of flux in Fig. 3F (n=3, +/- SD).

209

## 210 Five interfacial arginines contribute to POPG binding

211 In other ion channels, guanidine groups from interfacial arginine side chains are thought  
 212 to mediate binding of anionic phospholipids by charge interactions with the phospholipid  
 213 headgroup (9, 38). To test the hypothesis that this mechanism is present in a pLGIC, we mutated  
 214 all five arginines in the inner and outer interfacial regions of the ELIC TMD to glutamine (Fig. 4A).  
 215 Phospholipid binding was then assessed by delipidating each mutant in C10E5, and measuring

216 binding of POPG by native MS. While R123Q, R286Q, and R299Q could be stably delipidated,  
217 R117Q and R301Q aggregated (Fig. 4B). However, we found that double mutants with R299Q  
218 (i.e. R117Q/R299Q and R301Q/R299Q) could be stably delipidated. Thus, double mutants of all  
219 arginine mutants in combination with R299Q were expressed and delipidated (Fig. 4B). In the  
220 presence of 12  $\mu$ M POPG, the single mutants showed moderate decreases (13-18%) in the  
221 average number of bound POPG compared to WT (Fig. 4B). This decrease was not statistically  
222 significant. However, all double mutants significantly decreased the average number of bound  
223 POPG relative to WT by 38-41% and relative to R299Q by 27-32% (Fig. 4B). These results  
224 indicate that each interfacial arginine contributes approximately equally to POPG binding in ELIC.  
225 It is likely that significant decreases in binding could only be appreciated in the double mutants  
226 because of the variability in the data.

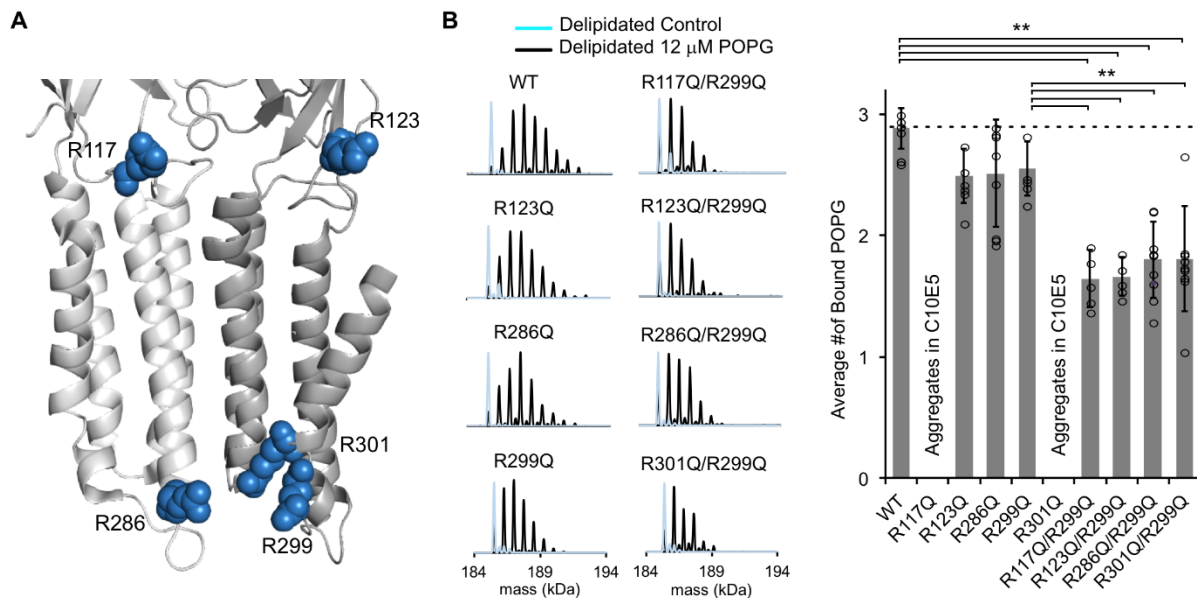

**Figure 4.** Mutations of five interfacial arginines reduce POPG binding. (A) Structure of ELIC showing two adjacent subunits and five arginine side chains that were mutated to glutamine. (B) *Left:* Representative deconvoluted spectra of ELIC WT and indicated mutants. Blue indicates spectra of delipidated ELIC in C10E5. Black indicates spectra of delipidated ELIC in C10E5 with 12  $\mu$ M POPG. *Right:* Plot of average number of bound POPG for ELIC WT and mutants, delipidated in C10E5, with 12  $\mu$ M POPG (n=5-8,  $\pm$ SD, \*\*p<0.01).

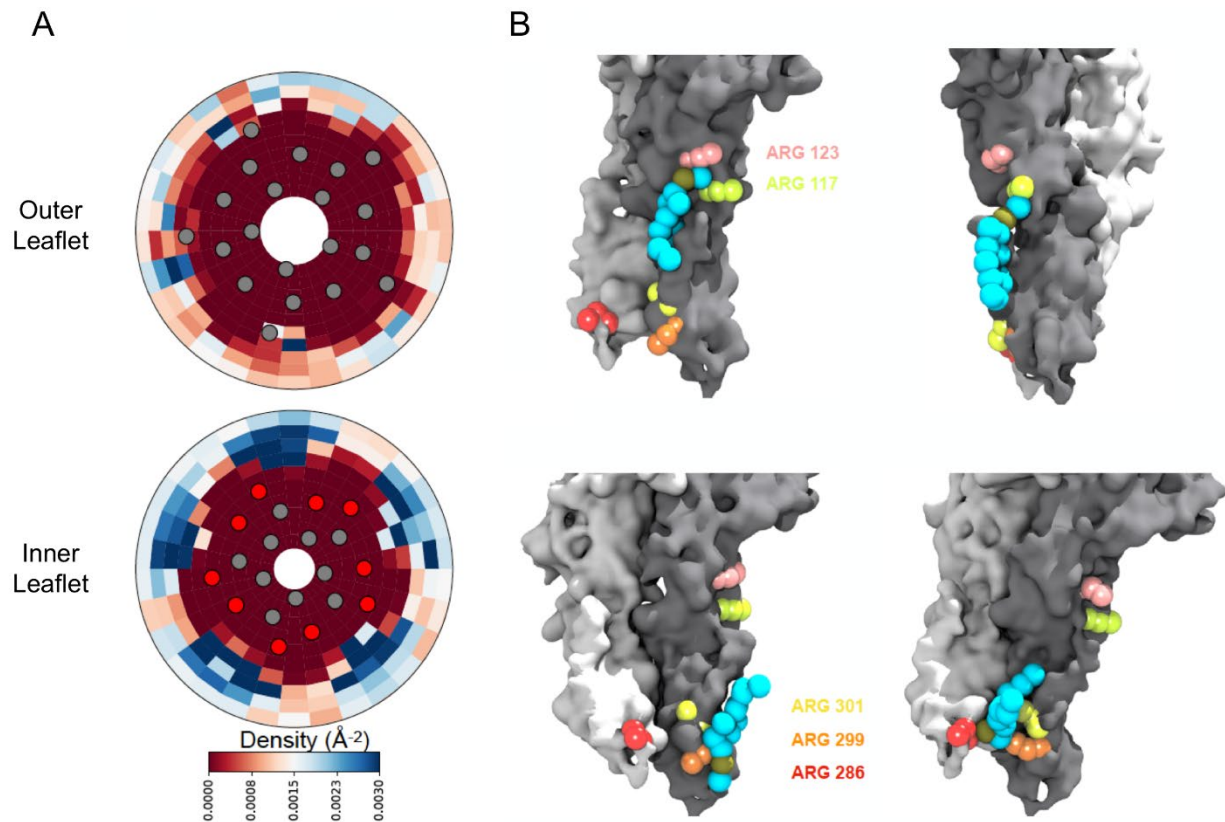

**Figure 5.** Density calculations of lipids in binary membranes and visualization of direct POPG-ELIC interactions at 10% POPG. **(A)** Distribution of POPG density in a POPG-POPC membrane, within 40  $\text{\AA}$  from the ELIC pore over the last half of a 15  $\mu\text{s}$  simulation, for both the outer leaflet (*top*) and the inner leaflet (*bottom*). Density is colored according to the color bar, where red and blue represent low and high POPG density, respectively. Circles represent the ELIC transmembrane backbone center of mass, with the helices containing the interfacial arginines colored in red **(B)** Representative frames after  $\sim 9 \mu\text{s}$  of simulation, showing multiple POPG binding modes associated with high density areas in (A). Two adjacent subunits of ELIC are shown in grey and white, while arginine side chains of interest are colored in peach, lime-yellow, orange, yellow, and red. POPG phosphate is colored in tan with the rest of the lipid in cyan.



228 We further examined these sites of interaction using our coarse-grained MD simulations.  
229 To identify whether boundary POPG were localized around specific helices or residues, two-  
230 dimensional densities of the negatively-charged headgroup bead were calculated. The  
231 distributions are separated by leaflet where each leaflet contained 10% POPG. As shown in  
232 Figure 5A, POPG was more likely to interact with ELIC in the inner leaflet than the outer leaflet,  
233 consistent with three out of five interfacial arginine residues being located on the intracellular  
234 interface of the ELIC TMD. These three arginines are located on TM3 (R286) and TM4 (R299 and  
235 R301). Contacts between POPG and all three of these residues are also visible in individual  
236 frames of the simulation (Fig. 5B). Moreover, POPG is more likely to be contacting the interfacial  
237 residues in TM4 (such as R299 and R301) than accessible interfacial residues in any other helix  
238 (Fig. 5A). The remaining two arginine residues are located at the TMD-ECD interface (R117 and  
239 R123). POPG density in the outer leaflet localized to these residues at intrasubunit sites between  
240 TM4 and TM1 or TM4 and TM3 (Fig. 5A), and contacts between these residues and POPG  
241 headgroups in the outer leaflet were also observed in snapshots from the MD simulations (Fig.  
242 5B). In summary, the native MS data and coarse-grained MD simulations demonstrate that five  
243 interfacial arginines contribute to specific POPG binding sites in the inner and outer leaflets  
244 adjacent to TM4.

245

### 246 **Specific interfacial arginines mediate POPG effect**

247 Having established that ELIC selectively binds POPG over neutral phospholipids, and that  
248 binding is mediated by five interfacial arginines, we examined the role of these binding sites on  
249 ELIC desensitization. We reconstituted each single mutant into giant liposomes composed of a  
250 2:1:1 ratio of POPC:POPE:POPG (25% POPG) to test channel function by excised patch-  
251 clamping. We hypothesized that since increasing mole% POPG decreases ELIC desensitization,  
252 certain arginine mutants, which disrupt POPG binding, may increase ELIC desensitization.  
253 Indeed, all five single arginine mutants showed variable increases in the rate or extent of

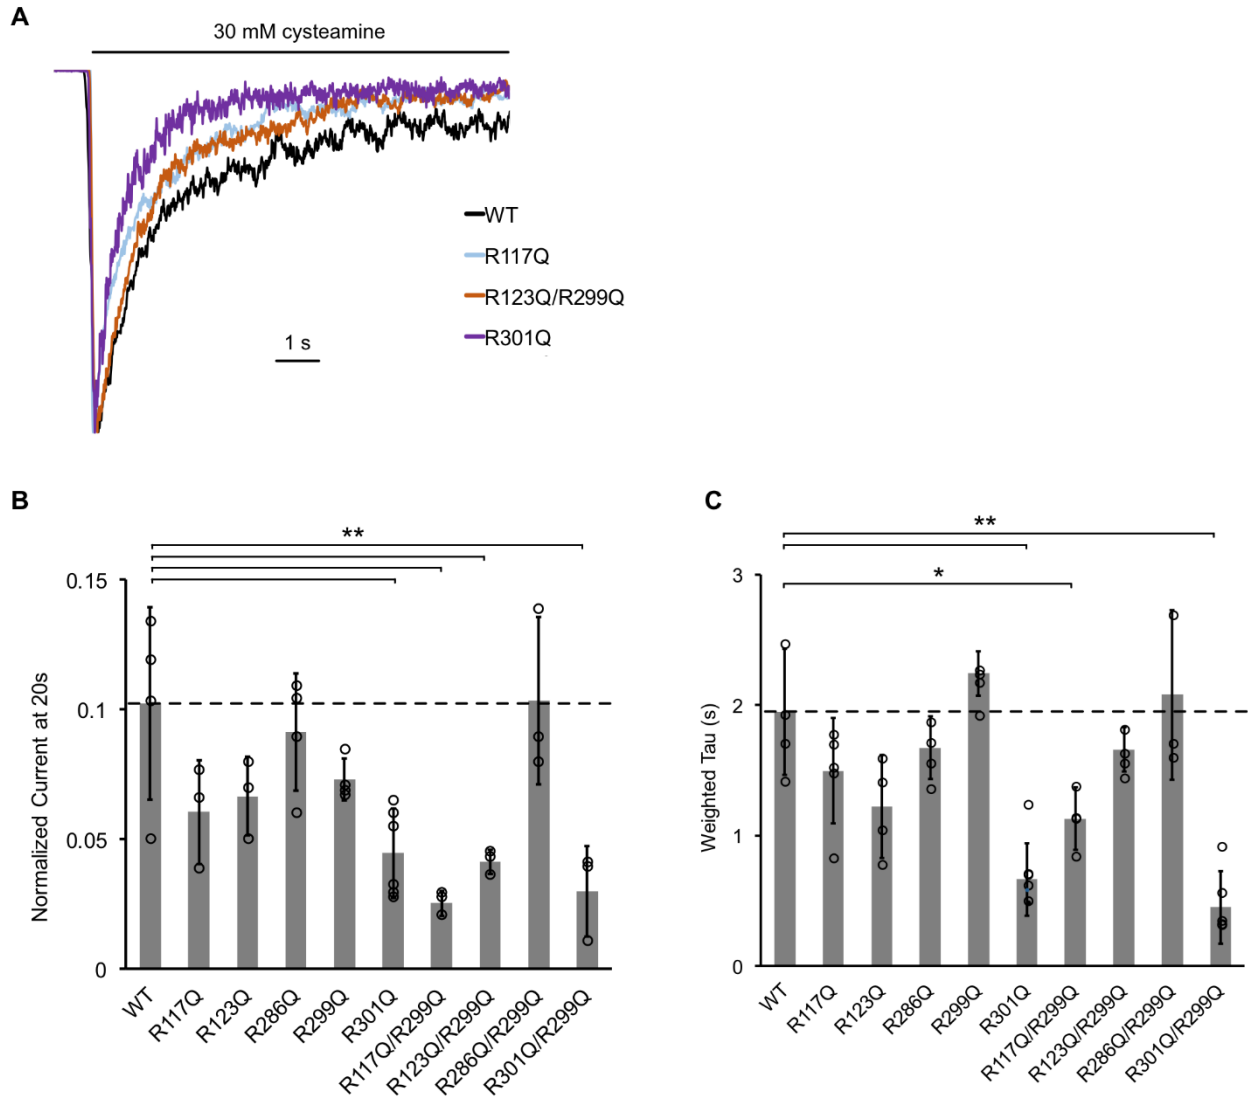

254

**Figure 6.** The effect of ELIC mutants on desensitization. **(A)** Normalized ELIC WT and mutant current responses to 30 mM cysteamine in 25% POPG liposomes. **(B)** Graph of ELIC WT and mutant currents 20 s after application of 30 mM cysteamine normalized to peak response in 25 mole% POPG liposomes ( $n=3-7$ ,  $\pm$ SD,  $**p<0.01$ ,  $*p<0.05$ ). **(C)** Same as (B) for weighted tau (time constants) of desensitization.

255 desensitization; however, these differences were generally small and statistically insignificant  
 256 except for R301Q (Fig. 6, Table 3). We also tested the double mutants, which showed significant  
 257 decreases in POPG binding. Three double mutants (R117Q/R299Q, R123Q/R299Q,  
 258 R301Q/R299Q) showed a significant increase in the extent of desensitization while two



259 (R117Q/R299Q, R301Q/R299Q) also showed a significant increase in the rate of desensitization  
 260 (Fig. 6, Table 3). The effects observed in the double mutants approximate the sum of effects  
 261 observed in the single mutants. Only R286Q/R299Q did not affect the extent or rate of  
 262 desensitization (Fig. 6, Table 3). The EC<sub>50</sub> of cysteamine response and activation kinetics were  
 263 also measured for all mutants; only R117Q and R117Q/R299Q showed significantly lower EC<sub>50</sub>  
 264 and activation tau values compared to WT (Table 3, Supplementary Fig. 7). Overall, these data  
 265 indicate that four of five interfacial arginine residues that reduce POPG binding (i.e. R117, R123,  
 266 R299, R301) also increase the rate and/or extent of ELIC desensitization.

|                    | Desensitization     |                     | Activation  | Cysteamine Response              |
|--------------------|---------------------|---------------------|-------------|----------------------------------|
|                    | Weighted $\tau$ (s) | Norm Current at 20s | $\tau$ (ms) | EC <sub>50</sub> (mM cysteamine) |
| <b>WT</b>          | 1.95 ± 0.48         | 0.100 ± 0.041       | 134 ± 50    | 5.1 ± 1.2                        |
| <b>R117Q</b>       | 1.49 ± 0.40         | 0.060 ± 0.020       | 54 ± 40 *   | 3.3 ± 0.9 *                      |
| <b>R123Q</b>       | 1.20 ± 0.39         | 0.067 ± 0.015       | 112 ± 65    | 3.7 ± 0.9                        |
| <b>R286Q</b>       | 1.67 ± 0.24         | 0.091 ± 0.023       | 106 ± 34    | 4.3 ± 0.4                        |
| <b>R299Q</b>       | 2.2 ± 0.17          | 0.074 ± 0.008       | 71 ± 27     | 4.7 ± 0.3                        |
| <b>R301Q</b>       | 0.66 ± 0.28 **      | 0.045 ± 0.017 **    | 72 ± 15     | 5.2 ± 0.8                        |
| <b>R117Q/R299Q</b> | 1.13 ± 0.24 *       | 0.025 ± 0.004 **    | 54 ± 26 *   | 2.4 ± 0.7 **                     |
| <b>R123Q/R299Q</b> | 1.66 ± 0.17         | 0.041 ± 0.005 **    | 74 ± 35     | 3.7 ± 0.6                        |
| <b>R286Q/R299Q</b> | 2.08 ± 0.65         | 0.103 ± 0.032       | 92 ± 27     | 4.7 ± 1.5                        |
| <b>R301Q/R299Q</b> | 0.45 ± 0.28 **      | 0.030 ± 0.017 **    | 71 ± 21     | 3.9 ± 0.9                        |

267

**Table 3:** ELIC WT and mutant channel properties in giant liposomes composed of 25 mole% POPG (n=3-7,  $\pm$ SD). Shown are weighted time constants ( $\tau$ ) for desensitization and currents 20 s after application of 30 mM cysteamine normalized to peak response. Also shown are activation time constants and EC<sub>50</sub> of cysteamine response. Light gray indicates mutant values which are significantly different from WT (dark gray) (\*\* p<0.01, \* p<0.05).

268

### 269 **L240A reduces desensitization and enhances POPG binding**

270 If mutations that disrupt POPG binding increase receptor desensitization, then a mutation  
 271 that decreases desensitization may enhance POPG binding. Mutation of a conserved pore-facing  
 272 9' TM2 leucine residue is known to slow desensitization in ELIC (L240A) (36) and other pLGICs.  
 273 To confirm this finding in our system, we reconstituted ELIC L240A into giant liposomes for patch-

274 clamping and observed a significant reduction in the extent and rate of desensitization (Fig. 7A).  
275 To examine POPG binding, L240A was then de-lipidated in C10E5 for native MS. Interestingly,  
276 L240A significantly increased POPG binding compared to WT at 12  $\mu$ M POPG ( $\sim$ 1.7x increase in  
277 average number of POPG bound) (Fig. 7B).

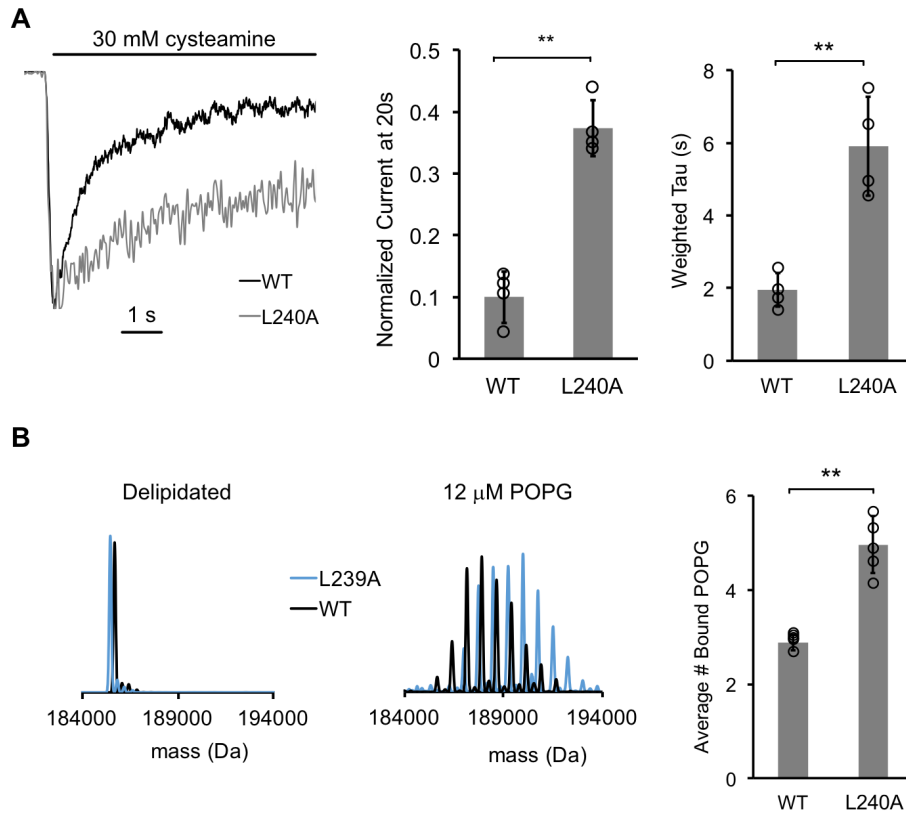

**Figure 7.** The L240A mutant decreases desensitization and increases POPG binding. **(A)**

*Left:* Normalized ELIC WT and L240A current responses to 30 mM cysteamine in 25% POPG liposomes. *Middle:* ELIC WT and L240A currents 20 s after application of 30 mM cysteamine normalized to peak response at 25 mole% POPG (n=4-5,  $\pm$ SD, \*\*p<0.01). *Right:* Weighted tau (time constants) of ELIC WT and L240A desensitization time courses at 25 mole% POPG (n=4-5,  $\pm$ SD, \*\*p<0.01). **(B)** *Left:* Representative deconvoluted spectra of ELIC WT (black) and L240A (blue) showing ELIC delipidated in C10E5 without and with 12  $\mu$ M POPG. *Right:* Graph of average number of bound POPG for ELIC WT and L240A, delipidated in C10E5, with 12  $\mu$ M POPG (n=4-5,  $\pm$ SD, \*\*p<0.01).

## 278 **Discussion**

279           Recent structural and computational evidence suggests that lipids bind to pLGICs at  
280 specific sites within the TMD (24, 25, 39-41). However, there is a scarcity of evidence showing  
281 that changes in direct lipid binding are correlated with functional effects (25). We show that the  
282 anionic phospholipid, POPG, selectively binds to ELIC using native MS, thermally stabilizes the  
283 channel, and decreases receptor desensitization. Overall, these data support the idea that lipid  
284 binding directly affects receptor stability and function. Further, mutations of arginine residues that  
285 reduce POPG binding also increase ELIC desensitization to varying degrees. While it is possible  
286 that these arginine mutations increase desensitization through a mechanism other than their  
287 effect on POPG binding, the correlation between binding and desensitization, and the finding that  
288 the L240A mutation, which reduces desensitization, increases POPG binding affinity supports this  
289 conclusion. Remarkably, the L240A mutation, which is located in the channel pore and remote  
290 from the lipid interface (Fig. 8), appears to allosterically alter the affinity of ELIC for POPG. Lipids  
291 may modulate ion channel activity through indirect effects on the physical properties of the  
292 membrane or through direct binding interactions (42, 43). The lipid binding data presented in this  
293 study using native MS provides evidence that direct binding of anionic phospholipids allosterically  
294 stabilizes the open state of a pLGIC relative to the desensitized state.

295           Membrane proteins including pLGICs are thought to determine their lipid  
296 microenvironment by specific binding interactions (28, 44). Our native MS measurements provide  
297 unique insights into phospholipid interaction with a pLGIC. First, we find that more POPG binds  
298 to ELIC compared to POPE or POPC at equivalent concentrations, suggesting that POPG binds  
299 to ELIC with higher affinity. This is supported by enrichment of POPG compared to POPE in  
300 phospholipids that are co-purified with ELIC, and coarse-grained simulations which show  
301 enrichment of POPG among the boundary phospholipids of ELIC. Second, native MS also allows

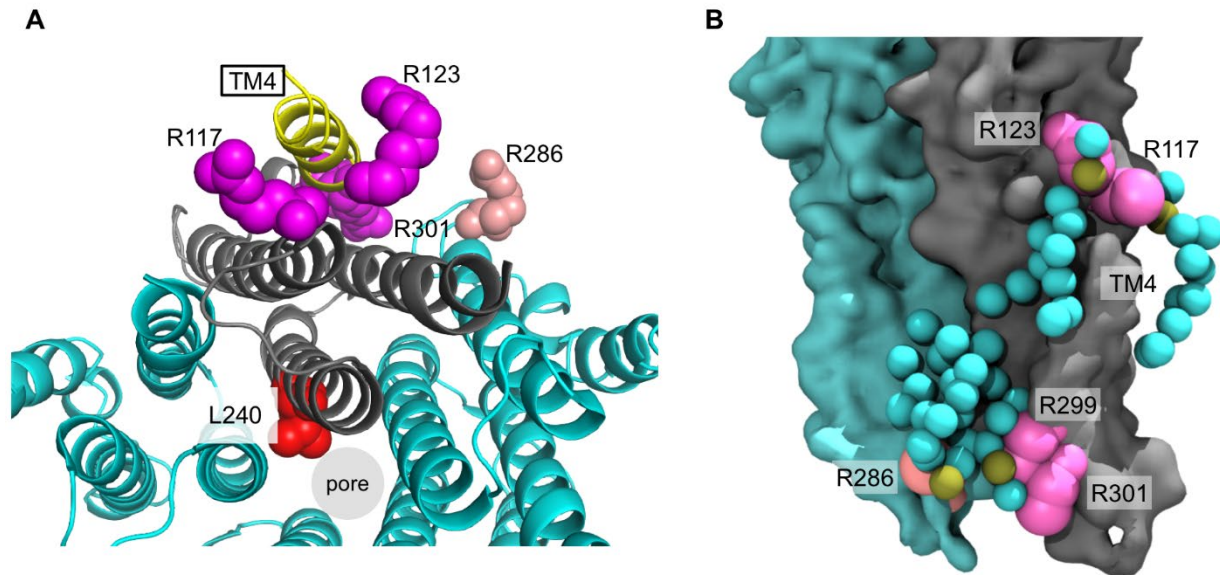

**Figure 8.** Arginines involved in POPG binding and ELIC desensitization. **(A)** Top view of ELIC highlighting TM4 (yellow) and showing the side chains of R117, R123 and R301 (magenta) adjacent to TM4, which increase ELIC desensitization, and R286 at the subunit interface (salmon), which has no effect on desensitization. L240 (red) faces the pore. **(B)** Image from coarse-grained simulations with 50% POPG showing two adjacent ELIC subunits and the mutated arginine side chains (R117, R123, R299 and R301 in magenta; R286 in salmon). Also, shown are all POPG lipids making contacts with the TMD in this snapshot.

302 determination of the stoichiometry and sites of lipid binding (32, 45). By relating binding  
303 stoichiometry and thermal stability, the data estimate that 32 POPG lipids, which is the average  
304 number of annular lipids in ELIC from MD simulations, results in greater than 80% of the stabilizing  
305 effect against thermal denaturation (Supplementary Fig. 5). This suggests that maximal thermal  
306 stability is achieved when the entire ELIC transmembrane domain (TMD) is surrounded by POPG.  
307 Although five interfacial arginine residues were identified to contribute to POPG binding in ELIC  
308 (25 arginines total), it is conceivable that each arginine side chain may interact with more than  
309 one phospholipid headgroup or that other sites exist.

310 To quantify the effect of the ELIC double mutants on specific POPG binding sites, we also  
311 fit the native MS binding data for the double mutants to a binomial binding model using the  
312 dissociation constant for POPG binding to WT and varying the number of available sites. POPG  
313 binding to the double mutants was best fit with a reduction in the number of available sites from  
314 32 in WT to 18-21 in the mutants (Supplementary Fig. 4). Given the ~35-45% decrease in bound  
315 phospholipid with each double mutant (mutation of two out of five arginines), we conclude that  
316 phospholipid binding at these residues constitute the highest affinity sites. This is indeed  
317 consistent with the POPG densities from the coarse-grained simulations, which show discrete  
318 enrichment of POPG lipids adjacent to these residues. Disruption of binding sites by mutation of  
319 these arginines may not prevent the occupancy of lipids at these sites per se, but may alter the  
320 lipid binding modes or occupancy times at these sites.

321 Previous studies examining the effects of lipids on pLGIC function found that nAChR and  
322 ELIC are inactive in POPC-only membranes (6, 15, 30), and it was proposed that this is due to  
323 uncoupling of agonist binding to channel activation (46). To examine ELIC channel activity in  
324 liposomes lacking anionic phospholipid, we utilized a stopped-flow flux assay, and demonstrated  
325 cysteamine-elicited flux by ELIC in POPC-only liposomes. The high sensitivity of this assay may  
326 be the reason ELIC activity could be detected, contrary to a prior study in which ELIC in POPC  
327 liposomes were injected into *Xenopus* oocytes (30). However, the ELIC activity was significantly  
328 decreased compared to POPC:POPE:POPG (2:1:1) liposomes. The low protein concentration  
329 used in this assay does not allow us to assess the reconstitution efficiencies. Thus, the overall  
330 lower flux rates and smaller amplitudes in POPC could stem from lower protein reconstitution.  
331 However, the faster desensitization kinetics in POPC liposomes can be resolved reliably, and are  
332 consistent with the patch-clamp measurements. The results substantiate the role of POPG in  
333 stabilizing the open state relative to the desensitized state, and demonstrate the utility of  
334 measuring pLGIC activity in liposomes of defined lipid composition using complementary patch-  
335 clamp and stopped-flow flux techniques.

336 While pLGICs are known to be sensitive to their lipid environment, the binding sites that  
337 mediate lipid modulation are not well defined. It has been proposed that TM4 is a lipid sensing  
338 structure in pLGICs due to its proximity to the lipid membrane and sensitivity to mutagenesis (41,  
339 47-49). Furthermore, crystal structures of GLIC show bound lipids within intrasubunit grooves  
340 between TM4-TM1 and TM4-TM3 (23), which have been proposed to be important determinants  
341 of channel opening (24, 25). Photolabeling studies have also identified intrasubunit neurosteroid  
342 binding sites adjacent to TM4 that mediate neurosteroid modulatory effects (50, 51). We show  
343 that POPG binding at multiple interfacial arginine residues, including R117, R124, R299 and R301  
344 which are localized to the extracellular and intracellular sides of TM4 (Fig. 8), are likely important  
345 in mediating the effect of POPG on ELIC desensitization. Examination of boundary POPG from  
346 coarse-grained simulations with high POPG mole% (50%) at 15  $\mu$ s shows POPG headgroups  
347 making contacts with all of these arginine side chains, and illustrates potential binding modes for  
348 the acyl chains (Fig. 8B). For example, boundary POPG with headgroups that interact with R301  
349 or R299 have acyl chains that make contacts with intrasubunit sites along the intracellular side of  
350 TM4 (Fig. 8B and 5B). R301, which has the largest effect on desensitization when mutated, is  
351 conserved among many mammalian pLGICs including GABA<sub>A</sub>R and nAChR isoforms, and R299  
352 is adjacent to R301 at the bottom of TM4. Mutations in this region of TM4 have profound effects  
353 on pLGIC desensitization (48, 49, 52, 53). R117 and R123 are located at the extracellular end of  
354 TM4, and boundary POPG with headgroups that interact with these residues have acyl chains  
355 that make contacts with intrasubunit sites on both sides of TM4 (Fig. 8B and 5B). Sites equivalent  
356 to R117 and R123 in GLIC were previously found to be occupied by a phospholipid and  
357 docosahexaenoic acid (DHA), respectively (24, 25). The polyunsaturated fatty acid, DHA, was  
358 found to increase desensitization in GLIC (25). Therefore, it is possible that the exact lipid  
359 structure occupying these sites results in different effects. Our results raise the hypothesis that  
360 lipids with polyunsaturated acyl chains or certain sterols (54) exert the opposite effect of activating  
361 phospholipids by acting as competitive antagonists.



362 In summary, the anionic phospholipid, POPG, decreases desensitization in the pLGIC,  
363 ELIC. POPG specifically binds to and stabilizes ELIC by interacting with interfacial arginine  
364 residues. Our results strongly suggest that binding of POPG at specific sites modulates receptor  
365 desensitization.

366

## 367 **Materials and Methods**

### 368 **Mutagenesis, expression and purification of ELIC**

369 pET26-MBP-ELIC was a gift from Raimund Dutzler (Addgene plasmid # 39239) and was used for  
370 WT ELIC expression and generation of mutants. Site-directed mutagenesis was performed by the  
371 standard Quikchange approach, and confirmed by Sanger sequencing (Genewiz, Plainfield, NJ).  
372 WT and mutant ELIC was expressed as previously described (25, 55) in OverExpress™ C43  
373 (DE3) *E. coli* (Lucigen, Middleton, WI). Cultures were grown in Terrific Broth (Sigma, St. Louis,  
374 MO) and induced with 0.1 mM IPTG for ~16 hours at 18 °C. Pelleted cells were resuspended in  
375 Buffer A (20 mM Tris pH 7.5, 100 mM NaCl) with cOmplete EDTA-free protease inhibitor (Roche,  
376 Indianapolis, IN), and lysed using an Avestin C5 emulsifier at ~15,000 psi. Membranes were  
377 collected by ultracentrifugation, resuspended in Buffer A, solubilized in 1 % DDM (Anatrace,  
378 Maumee, OH), and incubated with amylose resin (New England Biolabs, Ipswich, MA) for 2 hours.  
379 The resin was washed with 20 bed volumes of Buffer A, 0.02% DDM, 0.5 mM tris(2-  
380 carboxyethyl)phosphine (TCEP) and 1 mM EDTA, and eluted with Buffer A, 0.02% DDM, 0.05  
381 mM TCEP, and 40 mM maltose. Eluted protein was digested overnight with HRV-3C protease  
382 (Thermo Fisher, Waltham, MA) (10 units per mg ELIC) at 4 °C, and injected on a Sephadex 200  
383 10/300 (GE Healthcare Life Sciences, Pittsburgh, PA) size exclusion column in Buffer A, 0.02%  
384 DDM.

385

### 386 **Native MS measurements**

387 Native MS analysis was similar to previous descriptions for other membrane proteins (27). For  
388 analysis of ELIC in DDM, 30  $\mu$ l of purified protein in 0.02% DDM at  $\sim$ 1 mg/ml was buffer  
389 exchanged into 200 mM ammonium acetate pH 7.5 and 0.02% DDM using Biospin 6 gel filtration  
390 spin columns (Bio-Rad, Hercules, CA). 2  $\mu$ l of buffer exchanged ELIC was loaded into a  
391 borosilicate capillary emitter (Thermo Scientific, Waltham, MA), and analyzed by static nanospray  
392 on a Thermo QExactive EMR mass spectrometer. The following parameters were used to resolve  
393 the ELIC pentamer and minimize dissociation into tetramer and monomer: capillary voltage of 1.2  
394 kV, capillary temperature of 200  $^{\circ}$ C, ion transfer optics set with the injection flatapole, inter-  
395 flatapole lens, bent flatapole, transfer multiple as 8, 7, 6, 4 V, respectively, resolution 8,750, AGC  
396 target  $3 \times 10^6$ , trap pressure set to maximum, CID 200 V, and CE 100 V. For analysis of ELIC in  
397 C10E5, ELIC delipidated by injecting 300  $\mu$ g onto a Sephadex 200 10/300 column (GE  
398 Healthcare) at 0.5 ml/min pre-equilibrated with Buffer A, 10% glycerol, and 0.06% C10E5  
399 (Anatrace). 30  $\mu$ l aliquots were then buffer exchanged to 100 mM ammonium acetate pH 7.5,  
400 0.06% C10E5 using Biospin 6 columns, and diluted to 0.2 mg/ml. MS measurements on the  
401 QExactive EMR were performed with the parameters listed above except: capillary temperature  
402 100  $^{\circ}$ C, CID 75 V and CE 200 V. For lipid binding measurements, stocks of POPG lipid were  
403 prepared at 2x the concentration of POPG being tested in 100 mM ammonium acetate pH 7.5  
404 and 0.06% C10E5. Lipid stocks were then mixed with 0.4 mg/ml ELIC in a 1:1 volume ratio for a  
405 final concentration of 1  $\mu$ M ELIC, and samples were analyzed after  $>$ 5 min incubation.

406 MS spectra were deconvoluted using UniDec (56); deconvolution of spectra with bound  
407 lipid was restricted to the +26 to +22 charge states (Supplementary Fig. 3). Peak heights of apo  
408 and lipid-bound species were extracted from UniDec, and analyzed by two approaches. The  
409 average number of bound lipids was determined by the following relationship:

410

$$\text{Average number bound lipid} = \frac{\sum_{n=0}^k n \cdot I_n}{\sum_{n=0}^k I_n} \quad (1)$$



411 where  $n$  is the number of bound lipids and  $I_n$  is the deconvoluted peak height of ELIC with  $n$  bound  
412 lipids. Peak heights of apo and lipid-bound species were also plotted as mole fraction versus the  
413 number of bound lipids (Supplementary Fig. 4). These data were fit with a binomial binding model,  
414 which assumes that there are  $N$  sites each with equal affinity,  $K$ . The probability,  $p$ , that a site is  
415 occupied at the concentration of a given lipid,  $A$ , is defined as:

$$416 \quad p = \frac{[A]}{[A]+K} \quad (2)$$

417 Then, the probability ( $B$ ) that  $q$  sites are occupied out of  $N$  total sites is given by the binomial  
418 probability function:

$$419 \quad B(q) = \frac{N!}{q!(N-q)!} p^{N-q}(1-p)^q \quad (3)$$

420  $B(q)$  was used to determine the mole fraction of each lipid-bound species at a given  $[A]$ , which  
421 was used to fit the native MS data in Excel across all  $[A]$  by setting  $K$  constant and varying  $N$  or  
422 vice versa.

423

#### 424 Thermal stability assay

425 Purified WT ELIC in C10E5 (Buffer A, 0.06% C10E5) was diluted to 1  $\mu$ M in the absence or  
426 presence of various concentrations of phospholipid. Samples were analyzed without and with  
427 heating in the absence or presence of phospholipid. Analysis of protein thermal stability was  
428 performed by injecting 90  $\mu$ l of sample on a size exclusion column (Sephadex 200 10/300), and  
429 measuring the amplitude of the pentamer peak as previously described (57, 58). Heating was  
430 performed for 15 min at 32  $^{\circ}$ C, which resulted in a  $\sim$ 85% decrease in the pentamer amplitude  
431 compared to 4 $^{\circ}$ C. The stabilizing effect of a phospholipid was quantified as the pentamer  
432 amplitude in the presence of phospholipid (heated) divided by control (heated).

433

#### 434 Excised patch-clamp recordings from giant liposomes

435 ELIC WT and mutants were reconstituted into giant liposomes as previously described with some  
436 modifications (59). Three liposome preparations were used in this study: 1) 25% POPG (consists  
437 of 50% POPC/ 25% POPE/ 25% POPG), 2) 12% POPG (consists of 60% POPC/ 28% POPE/  
438 12% POPG), and 3) 40% POPG (consists of 35% POPC/ 25% POPE/ 40% POPG). These  
439 liposome compositions were chosen to vary POPG mole% while optimizing lipid mixtures to obtain  
440 ideal giant liposomes for patch-clamping. This was achieved by varying POPG mole% and POPC  
441 mole% inversely. Condition #1 was used for WT and all mutants, and conditions #2 and #3 were  
442 used in WT. Liposomes were prepared by drying 15-20 mg of lipid mixtures in chloroform using  
443 N<sub>2</sub> in a round bottom flask and then overnight in a vacuum dessicator. Dried lipids were rehydrated  
444 at 5 mg/ml in 10 mM MOPS pH 7, and 150 mM NaCl (MOPS buffer), subjected to ten freeze-thaw  
445 cycles ten, and then small unilamellar liposomes were formed by extrusion using a 400 nm filter  
446 (Avanti Lipids, Alabaster, AL) and bath sonication (30 sec x 5). 5 mg of liposomes in 1 ml were  
447 destabilized by adding DDM to 0.2% and rotating for 1 hour at room temperature followed by 0.3-  
448 0.5 mg of ELIC WT or mutants at ~4-5 mg/ml and incubation for 30 min. To remove DDM, SM-2  
449 Bio-beads (Bio-Rad) were added in five batches (30, 30, 50, 100, and 100 mg). The first three  
450 batches were added each hour along with 1 ml of MOPS buffer to make a final volume of 4 ml  
451 while rotating at room temperature. After adding the first 100 mg batch, the proteoliposomes were  
452 rotated overnight at 4 °C, followed by the last 100 mg the next day for 3 hours at room  
453 temperature. Proteoliposomes were harvested by ultracentrifugation at 150,000 x g for 1 hour at  
454 4 °C, and the pellet resuspended with 80 µl of MOPS buffer for a lipid concentration of ~50 mg/ml.  
455 Giant liposomes were formed by drying 10 µl of proteoliposomes on a glass coverslip in a  
456 desiccator for 3-5 hours at 4 °C followed by rehydration with 60 µl of MOPS buffer overnight at 4  
457 °C and at least 2 hours at room temperature the next day. Giant liposomes were resuspended by  
458 pipetting and then applied to a petri dish with MOPS buffer.

459 Patch-clamp recordings were performed using borosilicate glass pipettes pulled to ~2-3  
460 MΩ using a P-2000 puller (Sutter instruments, Novato, CA). Pipettes were filled with 10 mM  
461 MOPS pH 7, 150 mM NaCl, and 0.5 mM BaCl<sub>2</sub>. Excised patches (the orientation of ELIC in the  
462 liposomes is not known; therefore, these patches are not defined as outside-out or inside-out)  
463 were held at -60 mV, and bath solutions consisted of 10 mM MOPS pH 7, 150 mM NaCl, 0.5 mM  
464 BaCl<sub>2</sub>, 1 mM dithiothreitol (DTT), and varying concentrations of cysteamine. DTT was added to  
465 the bath solution to prevent cysteamine oxidation. Rapid solution exchange was achieved with a  
466 three-barreled flowpipe mounted and adjusted by to a SF-77B fast perfusion system (Warner  
467 Instrument Corporation, Hamden, CT). Liquid junction current at the open pipette tip  
468 demonstrated 10-90% exchange times of <10 ms. Data was collected at 20 kHz using an  
469 Axopatch 200B amplifier (Molecular Devices, San Jose, CA) and a Digidata 1322A (Molecular  
470 Devices) with Axopatch software, and a low pass Bessel filter of 10 kHz was applied to the  
471 currents. Analysis of currents was performed with Clampfit 10.4.2 (Molecular Devices). Activation  
472 currents were fit to a single exponential equation, and desensitization currents were fit to both  
473 single and double exponential equations. The majority of desensitization currents were best fit  
474 with a double exponential, and weighted time constants were derived using the following  
475 calculation:

$$476 \quad \text{Weighted Tau} = \frac{(A1 \cdot \tau1) + (A2 \cdot \tau2)}{A1 + A2} \quad (4)$$

477 where A1 and A2 are the weighted coefficients of the first and second exponential components.  
478 The reported weighted average time constants are averages of weighted time constants from  
479 double exponential fits and time constants from single exponential fits. Peak cysteamine dose  
480 response curves were fit to a Hill equation, keeping n constant at 2, which provided a reasonable  
481 fit for all data sets. All statistical comparisons were made using a one-way ANOVA with post-hoc  
482 Tukey HSD test.

483

484 Stopped-flow fluorescence recordings

485 The fluorescence-based sequential-mixing stopped-flow assay was carried out with an SX20  
486 stopped-flow spectrofluorimeter (Applied Photophysics, Leatherhead, UK) at 25 °C. To  
487 reconstitute ELIC into large unilamellar vesicles (LUVs), 15 mg of lipids (POPC or  
488 POPC:POPE:POPG 2:1:1) were dried in glass vials to a thin film under a constant N<sub>2</sub> stream.  
489 Lipids were further dried under vacuum overnight. The next day, lipids were rehydrated in  
490 reconstitution buffer (1114 µl of 15 mM Hepes, 150 mM NaNO<sub>3</sub>, pH 7). 33 mg CHAPS were added  
491 stepwise while sonicating lipids in a bath sonicator until the solution was clear. 1057 µl of a 75  
492 mM ANTS stock solution (in ddH<sub>2</sub>O, pH 7) was added together with purified ELIC (1 µg/mg lipid),  
493 mixed and incubated for 20 min. Detergent removal was initiated by addition of 0.7 g SM-2  
494 BioBeads (BioRad) in assay buffer (10 mM Hepes, 140 mM NaNO<sub>3</sub>, pH 7). The reconstitution mix  
495 was incubated for 2.5 h at 21 °C under gentle agitation. The liposome-containing supernatant was  
496 transferred to a new glass tube and stored overnight at 13 °C. The liposome solution was  
497 sonicated in a bath sonicator for 30 s and extruded through a 0.1 µm membrane (Whatman) using  
498 a mini-extruder (Avanti Polar lipids). Extra-vesicular ANTS were removed with a 10 ml desalting  
499 column (PD-10, GE Lifesciences). Right before the assay, liposomes were diluted 5-fold in assay  
500 buffer to ensure a good signal to noise ratio.

501 For the assay, ELIC-containing liposomes were mixed 1:1 with pre-mix buffer (assay  
502 buffer supplemented with 10 mM cysteamine to reach 5 mM after mixing) and incubated for  
503 defined amounts of time (10 ms to 25 s). A second 1:1 mixing step was performed with quenching  
504 buffer (10 mM Hepes, 90 mM NaNO<sub>3</sub>, 50 mM TINO<sub>3</sub>, pH 7). ANTS fluorescence was excited at  
505 360 nm and the integral fluorescence above 420 nm was recorded for 1 s. For each delay time,  
506 at least 8 repeats under identical conditions were performed.

507 To analyze the data, each repeat was visually inspected and outliers were removed. Each  
508 remaining repeat was then fitted to a stretched exponential (Equation 5) and the rate of TI<sup>+</sup> influx  
509 was determined at 2 ms (Equation 6).

510 
$$F_t = F_\infty + (F_0 - F_\infty) \cdot e^{\left\{-\left(\frac{t}{\tau}\right)^\beta\right\}} \quad (5)$$

511 
$$k_t = \left(\frac{\beta}{\tau}\right) \cdot \left(\frac{2 \text{ ms}}{\tau}\right)^{(\beta-1)} \quad (6)$$

512 with  $F_t$ ,  $F_\infty$ ,  $F_0$  being the fluorescence at time  $t$ , the final fluorescence and the initial fluorescence,  
513 respectively.  $t$  is the time (in s),  $\tau$  the time constant (in s) and  $\beta$  the stretched exponential factor.  
514  $k_t$  is the calculated rate (in  $\text{s}^{-1}$ ) of Thallium influx at 2 ms.

515 The rate constants were averaged and the mean and standard deviations were  
516 determined and plotted (Fig 2F). The experiments were repeated for each lipid composition using  
517 three independent reconstitutions. The rates and standard deviations were averaged and plotted  
518 as function of the delay time. The time course was fitted according to a double-exponential  
519 function to obtain the rates of activation and desensitization.

520

#### 521 Lipid extraction and MS analysis

522 Lipids were extracted using a Bligh-Dyer extraction (60). Briefly, 100  $\mu\text{g}$  of purified ELIC in DDM  
523 and 150  $\mu\text{g}$  of *E. coli* membranes derived from cell cultures transformed and induced for ELIC  
524 expression, respectively, were mixed with 1 ml chloroform, 2 ml methanol and 0.8 ml water, and  
525 vortexed for 1 min, followed by an additional 1 ml chloroform and 1 ml water, and vortex for 3 min.  
526 The samples were centrifuged for 3 min at 500 x  $g$ , and the lower organic phase removed for  
527 analysis, using a Thermo Scientific LTQ Orbitrap Velos mass spectrometer. Lipid extracts were  
528 loop injected (1.5  $\mu\text{l}/\text{min}$ ) using a syringe pump that delivered a continuous flow of methanol at 15  
529  $\mu\text{l}/\text{min}$  into the ESI source. High resolution ( $R = 100,000$  at  $m/z$  400) MS and MS/MS analyses  
530 were performed in negative ion mode. The skimmer of the ESI source was set at ground potential,  
531 electrospray voltage 4 kV, capillary temperature 300  $^\circ\text{C}$ , AGC target  $5 \times 10^4$ , and maximum  
532 injection time 50 ms.  $\text{MS}^n$  experiments for identification of lipid structures were carried out with an

533 optimized relative collision energy of 32%, activation  $q$  value of 0.25, activation time of 10 ms,  
534 and mass selection window of 1 Da.

535

### 536 Coarse-grained simulations of ELIC

537 All simulations reported here used the MARTINI 2.2 (61) coarse-grained topology and force field.  
538 The crystal structure of ELIC (PDB 3RQW) (62) was coarse-grained using MARTINI martinize.py  
539 script. Secondary structural restraints were constructed using martinize.py while imposed through  
540 Gromacs (63). Conformational restraints were preserved through harmonic bonds between  
541 backbone beads less than 0.5 nm apart with a coefficient of  $900 \text{ kJ mol}^{-1}$ . Pairs were determined  
542 using the EIneDyn algorithm (64). Membranes were constructed using the MARTINI script  
543 insane.py (61). The insane.py script randomly places lipids throughout both inner and outer  
544 membranes and embeds selected proteins into the membrane. Two series of simulations were  
545 developed, the first using POPE and POPG, and the second POPC and POPG. Box sizes were  
546 about  $30 \times 30 \times 25 \text{ nm}^3$  and each simulation box contained about 3000 lipids.

547 Molecular dynamics simulations were carried out using GROMACS 5.1.4 (63). All systems  
548 were run using van der Waals (vdW) and electrostatics in cutoff and reaction-field, respectively,  
549 with a dielectric constant of  $\epsilon = 15$ . vdW and electrostatics used a cutoff length of 1.1 nm as  
550 defined in current MARTINI build specifications. Energy minimizations were performed for about  
551 30,000 steps. All systems were run for short equilibration steps. Canonical ensembles (NVT) were  
552 run for 100 ps using Berendsen thermostat set to 323 K with the temperature coupling constant  
553 set to 1 ps. Isothermal-Isobaric ensemble (NPT) equilibration was run for 5000 ps using  
554 Berendsen thermostat and barostat. The thermostat was set to 323 K with the temperature  
555 coupling constant set to 1 ps, and the barostat was set to a pressure coupling constant of 3 ps  
556 with a compressibility of  $3 \times 10^{-5} \text{ bar}^{-1}$  holding at 1 bar. Molecular dynamics were carried out using  
557 NPT ensemble and were simulated for 15  $\mu\text{s}$  with a time step of 0.015 ps using v-rescale  
558 thermostat set to 323 K and a temperature coupling constant of 1 ps. Membranes consisting of

559 POPE used the Parrinello-Rahman barostat, and membranes consisting of POPC used the  
560 Berendsen barostat, both under semi-isotropic coupling. The reference pressure was set to 1 bar,  
561 the compressibility  $3 \times 10^{-4} \text{ bar}^{-1}$ , and the pressure coupling constant 1 ps.

562 Annular lipids were determined using the annular lipid metric B:

$$563 \quad B_i = \left\langle \frac{b_i}{b_{tot}} \right\rangle \frac{1}{x_i} - 1 \quad (7)$$

564 where  $b_i$  is the instantaneous number of boundary lipids of species  $i$ ,  $b_{tot}$  is the instantaneous  
565 total number of boundary lipids,  $x_i$  is the overall (bulk) fraction of species  $i$  and the brackets  
566 represent an average over time and replicas.  $B_i < 0$  and  $B_i > 0$  indicate enrichment and depletion  
567 of species  $i$ , respectively, relative to the abundance in the bulk membrane. A given lipid was  
568 counted as a boundary lipid if it was within 6 Å of the ELIC transmembrane domain.

569 Two dimensional lipid density distributions around a central ELIC pentamer were  
570 calculated for each leaflet using polar coordinates (28). For every sampled frame, all lipids of  
571 species  $i$  were separated into leaflets. For all  $i$  lipids in a given leaflet, the vector separating the  
572 phosphate beads from ELIC center was calculated and projected onto the membrane plane. The  
573 two-dimensional separation vector was then used to assign the lipid to the appropriate polar bin  
574 of radial bin width  $4 \text{ Å}$  and angular bin width  $\frac{\pi}{15}$ . The area density in each bin was averaged over  
575 time and replicas.

576

577

578

579 **Acknowledgements**

580 We are grateful to Alex Evers, Joe Henry Steinbach, Christopher Lingle and Gustav Akk for helpful  
581 discussions and edits regarding this study and the preparation of the manuscript. We also  
582 acknowledge Arthur Laganowsky and Yang Liu for guidance with regard to sample preparation of  
583 ELIC for native MS measurements. We are indebted to Michael Gross at the Washington  
584 University NIH/NIGMS-supported biomedical mass spectrometry resource for use of the Thermo  
585 QExactive EMR mass spectrometer, and Christopher Lingle for use of a patch-clamp rig for  
586 electrophysiology recordings. Computational resources were provided through the Rutgers  
587 Discovery Informatics Institute.

588

589 **Competing Interests**

590 The authors declare that no competing interests exist.

591

592 **Reference**

- 593 1. Corringier PJ, Poitevin F, Prevost MS, Sauguet L, Delarue M, Changeux JP. Structure and  
594 pharmacology of pentameric receptor channels: from bacteria to brain. *Structure*. 2012;20(6):941-  
595 56.
- 596 2. Allen JA, Halverson-Tamboli RA, Rasenick MM. Lipid raft microdomains and  
597 neurotransmitter signalling. *Nat Rev Neurosci*. 2007;8(2):128-40.
- 598 3. Baenziger JE, Henault CM, Therien JP, Sun J. Nicotinic acetylcholine receptor-lipid  
599 interactions: Mechanistic insight and biological function. *Biochim Biophys Acta*.  
600 2015;1848(9):1806-17.
- 601 4. Rosenhouse-Dantsker A, Mehta D, Levitan I. Regulation of ion channels by membrane  
602 lipids. *Compr Physiol*. 2012;2(1):31-68.
- 603 5. Evers AS, Elliott WJ, Lefkowitz JB, Needleman P. Manipulation of rat brain fatty acid  
604 composition alters volatile anesthetic potency. *J Clin Invest*. 1986;77(3):1028-33.



- 605 6. Criado M, Eibl H, Barrantes FJ. Functional properties of the acetylcholine receptor  
606 incorporated in model lipid membranes. Differential effects of chain length and head group of  
607 phospholipids on receptor affinity states and receptor-mediated ion translocation. *J Biol Chem.*  
608 1984;259(14):9188-98.
- 609 7. Cheng WW, D'Avanzo N, Doyle DA, Nichols CG. Dual-mode phospholipid regulation of  
610 human inward rectifying potassium channels. *Biophys J.* 2011;100(3):620-8.
- 611 8. Chemin J, Patel AJ, Duprat F, Lauritzen I, Lazdunski M, Honore E. A phospholipid sensor  
612 controls mechanogating of the K<sup>+</sup> channel TREK-1. *EMBO J.* 2005;24(1):44-53.
- 613 9. Hite RK, Butterwick JA, MacKinnon R. Phosphatidic acid modulation of Kv channel voltage  
614 sensor function. *Elife.* 2014;3.
- 615 10. Schmidt D, Jiang QX, MacKinnon R. Phospholipids and the origin of cationic gating  
616 charges in voltage sensors. *Nature.* 2006;444(7120):775-9.
- 617 11. Zolles G, Klocker N, Wenzel D, Weisser-Thomas J, Fleischmann BK, Roeper J, et al.  
618 Pacemaking by HCN channels requires interaction with phosphoinositides. *Neuron.*  
619 2006;52(6):1027-36.
- 620 12. daCosta CJ, Medaglia SA, Lavigne N, Wang S, Carswell CL, Baenziger JE. Anionic lipids  
621 allosterically modulate multiple nicotinic acetylcholine receptor conformational equilibria. *J Biol*  
622 *Chem.* 2009;284(49):33841-9.
- 623 13. Hamouda AK, Sanghvi M, Sauls D, Machu TK, Blanton MP. Assessing the lipid  
624 requirements of the *Torpedo californica* nicotinic acetylcholine receptor. *Biochemistry.*  
625 2006;45(13):4327-37.
- 626 14. daCosta CJ, Wagg ID, McKay ME, Baenziger JE. Phosphatidic acid and  
627 phosphatidylserine have distinct structural and functional interactions with the nicotinic  
628 acetylcholine receptor. *J Biol Chem.* 2004;279(15):14967-74.
- 629 15. Ochoa EL, Dalziel AW, McNamee MG. Reconstitution of acetylcholine receptor function  
630 in lipid vesicles of defined composition. *Biochim Biophys Acta.* 1983;727(1):151-62.

- 631 16. Fong TM, McNamee MG. Correlation between acetylcholine receptor function and  
632 structural properties of membranes. *Biochemistry*. 1986;25(4):830-40.
- 633 17. Baenziger JE, Morris ML, Darsaut TE, Ryan SE. Effect of membrane lipid composition on  
634 the conformational equilibria of the nicotinic acetylcholine receptor. *J Biol Chem*.  
635 2000;275(2):777-84.
- 636 18. Velisetty P, Chakrapani S. Desensitization mechanism in prokaryotic ligand-gated ion  
637 channel. *J Biol Chem*. 2012;287(22):18467-77.
- 638 19. Ellena JF, Blazing MA, McNamee MG. Lipid-protein interactions in reconstituted  
639 membranes containing acetylcholine receptor. *Biochemistry*. 1983;22(24):5523-35.
- 640 20. Mantipragada SB, Horvath LI, Arias HR, Schwarzmann G, Sandhoff K, Barrantes FJ, et  
641 al. Lipid-protein interactions and effect of local anesthetics in acetylcholine receptor-rich  
642 membranes from *Torpedo marmorata* electric organ. *Biochemistry*. 2003;42(30):9167-75.
- 643 21. Dreger M, Krauss M, Herrmann A, Hucho F. Interactions of the nicotinic acetylcholine  
644 receptor transmembrane segments with the lipid bilayer in native receptor-rich membranes.  
645 *Biochemistry*. 1997;36(4):839-47.
- 646 22. Antollini SS, Barrantes FJ. Disclosure of discrete sites for phospholipid and sterols at the  
647 protein-lipid interface in native acetylcholine receptor-rich membrane. *Biochemistry*.  
648 1998;37(47):16653-62.
- 649 23. Bocquet N, Nury H, Baaden M, Le Poupon C, Changeux JP, Delarue M, et al. X-ray  
650 structure of a pentameric ligand-gated ion channel in an apparently open conformation. *Nature*.  
651 2009;457(7225):111-4.
- 652 24. Prevost MS, Sauguet L, Nury H, Van Renterghem C, Huon C, Poitevin F, et al. A locally  
653 closed conformation of a bacterial pentameric proton-gated ion channel. *Nat Struct Mol Biol*.  
654 2012;19(6):642-9.
- 655 25. Basak S, Schmandt N, Gicheru Y, Chakrapani S. Crystal structure and dynamics of a lipid-  
656 induced potential desensitized-state of a pentameric ligand-gated channel. *Elife*. 2017;6.

- 657 26. Laganowsky A, Reading E, Allison TM, Ulmschneider MB, Degiacomi MT, Baldwin AJ, et  
658 al. Membrane proteins bind lipids selectively to modulate their structure and function. *Nature*.  
659 2014;510(7503):172-5.
- 660 27. Gault J, Donlan JA, Liko I, Hopper JT, Gupta K, Housden NG, et al. High-resolution mass  
661 spectrometry of small molecules bound to membrane proteins. *Nat Methods*. 2016;13(4):333-6.
- 662 28. Sharp L, Salari R, Brannigan G. Boundary lipids of the nicotinic acetylcholine receptor:  
663 Spontaneous partitioning via coarse-grained molecular dynamics simulation. *Biochim Biophys*  
664 *Acta Biomembr*. 2019;1861(4):887-96.
- 665 29. Brannigan G. Direct Interactions of Cholesterol With Pentameric Ligand-Gated Ion  
666 Channels: Testable Hypotheses From Computational Predictions. *Curr Top Membr*. 2017;80:163-  
667 86.
- 668 30. Carswell CL, Sun J, Baenziger JE. Intramembrane aromatic interactions influence the lipid  
669 sensitivities of pentameric ligand-gated ion channels. *J Biol Chem*. 2015;290(4):2496-507.
- 670 31. Reading E, Liko I, Allison TM, Benesch JL, Laganowsky A, Robinson CV. The role of the  
671 detergent micelle in preserving the structure of membrane proteins in the gas phase. *Angew*  
672 *Chem Int Ed Engl*. 2015;54(15):4577-81.
- 673 32. Liu Y, LoCaste CE, Liu W, Poltash ML, Russell DH, Laganowsky A. Selective binding of  
674 a toxin and phosphatidylinositides to a mammalian potassium channel. *Nat Commun*.  
675 2019;10(1):1352.
- 676 33. Nji E, Chatzikyriakidou Y, Landreh M, Drew D. An engineered thermal-shift screen reveals  
677 specific lipid preferences of eukaryotic and prokaryotic membrane proteins. *Nat Commun*.  
678 2018;9(1):4253.
- 679 34. Zimmermann I, Marabelli A, Bertozzi C, Sivilotti LG, Dutzler R. Inhibition of the prokaryotic  
680 pentameric ligand-gated ion channel ELIC by divalent cations. *PLoS Biol*. 2012;10(11):e1001429.

- 681 35. Laha KT, Ghosh B, Czajkowski C. Macroscopic kinetics of pentameric ligand gated ion  
682 channels: comparisons between two prokaryotic channels and one eukaryotic channel. *PLoS*  
683 *One*. 2013;8(11):e80322.
- 684 36. Gonzalez-Gutierrez G, Lukk T, Agarwal V, Papke D, Nair SK, Grosman C. Mutations that  
685 stabilize the open state of the *Erwinia chrysanthemi* ligand-gated ion channel fail to change the  
686 conformation of the pore domain in crystals. *Proc Natl Acad Sci U S A*. 2012;109(16):6331-6.
- 687 37. Posson DJ, Rusinova R, Andersen OS, Nimigean CM. Stopped-Flow Fluorometric Ion  
688 Flux Assay for Ligand-Gated Ion Channel Studies. *Methods Mol Biol*. 2018;1684:223-35.
- 689 38. Lee SJ, Wang S, Borschel W, Heyman S, Gyore J, Nichols CG. Secondary anionic  
690 phospholipid binding site and gating mechanism in Kir2.1 inward rectifier channels. *Nat Commun*.  
691 2013;4:2786.
- 692 39. Althoff T, Hibbs RE, Banerjee S, Gouaux E. X-ray structures of GluCl in apo states reveal  
693 a gating mechanism of Cys-loop receptors. *Nature*. 2014;512(7514):333-7.
- 694 40. Laverty D, Desai R, Uchanski T, Masiulis S, Stec WJ, Malinauskas T, et al. Cryo-EM  
695 structure of the human  $\alpha 1\beta 3\gamma 2$  GABAA receptor in a lipid bilayer. *Nature*.  
696 2019;565(7740):516-20.
- 697 41. Carswell CL, Henault CM, Murlidaran S, Therien JPD, Juranka PF, Surujballi JA, et al.  
698 Role of the Fourth Transmembrane  $\alpha$  Helix in the Allosteric Modulation of Pentameric Ligand-  
699 Gated Ion Channels. *Structure*. 2015;23(9):1655-64.
- 700 42. Cordero-Morales JF, Vasquez V. How lipids contribute to ion channel function, a fat  
701 perspective on direct and indirect interactions. *Curr Opin Struct Biol*. 2018;51:92-8.
- 702 43. daCosta CJ, Dey L, Therien JP, Baenziger JE. A distinct mechanism for activating  
703 uncoupled nicotinic acetylcholine receptors. *Nat Chem Biol*. 2013;9(11):701-7.
- 704 44. Patrick JW, Boone CD, Liu W, Conover GM, Liu Y, Cong X, et al. Allostery revealed within  
705 lipid binding events to membrane proteins. *Proc Natl Acad Sci U S A*. 2018.

- 706 45. Habeck M, Kapri-Pardes E, Sharon M, Karlsh SJ. Specific phospholipid binding to Na,K-  
707 ATPase at two distinct sites. *Proc Natl Acad Sci U S A*. 2017;114(11):2904-9.
- 708 46. daCosta CJ, Baenziger JE. A lipid-dependent uncoupled conformation of the acetylcholine  
709 receptor. *J Biol Chem*. 2009;284(26):17819-25.
- 710 47. Tobimatsu T, Fujita Y, Fukuda K, Tanaka K, Mori Y, Konno T, et al. Effects of substitution  
711 of putative transmembrane segments on nicotinic acetylcholine receptor function. *FEBS Lett*.  
712 1987;222(1):56-62.
- 713 48. Bouzat C, Roccamo AM, Garbus I, Barrantes FJ. Mutations at lipid-exposed residues of  
714 the acetylcholine receptor affect its gating kinetics. *Mol Pharmacol*. 1998;54(1):146-53.
- 715 49. Li L, Lee YH, Pappone P, Palma A, McNamee MG. Site-specific mutations of nicotinic  
716 acetylcholine receptor at the lipid-protein interface dramatically alter ion channel gating. *Biophys*  
717 *J*. 1992;62(1):61-3.
- 718 50. Cheng WWL, Chen ZW, Bracamontes JR, Budelier MM, Krishnan K, Shin DJ, et al.  
719 Mapping Two Neurosteroid Modulatory Sites in the Prototypic Pentameric Ligand Gated Ion  
720 Channel GLIC. *J Biol Chem*. 2018.
- 721 51. Chen ZW, Bracamontes JR, Budelier MM, Germann AL, Shin DJ, Kathiresan K, et al.  
722 Multiple functional neurosteroid binding sites on GABAA receptors. *PLoS Biol*.  
723 2019;17(3):e3000157.
- 724 52. Domville JA, Baenziger JE. An allosteric link connecting the lipid-protein interface to the  
725 gating of the nicotinic acetylcholine receptor. *Sci Rep*. 2018;8(1):3898.
- 726 53. Lee YH, Li L, Lasalde J, Rojas L, McNamee M, Ortiz-Miranda SI, et al. Mutations in the  
727 M4 domain of *Torpedo californica* acetylcholine receptor dramatically alter ion channel function.  
728 *Biophys J*. 1994;66(3 Pt 1):646-53.
- 729 54. Shen W, Mennerick S, Covey DF, Zorumski CF. Pregnenolone sulfate modulates  
730 inhibitory synaptic transmission by enhancing GABA(A) receptor desensitization. *J Neurosci*.  
731 2000;20(10):3571-9.

- 732 55. Hilf RJ, Dutzler R. X-ray structure of a prokaryotic pentameric ligand-gated ion channel.  
733 Nature. 2008;452(7185):375-9.
- 734 56. Marty MT, Baldwin AJ, Marklund EG, Hochberg GK, Benesch JL, Robinson CV. Bayesian  
735 deconvolution of mass and ion mobility spectra: from binary interactions to polydisperse  
736 ensembles. Anal Chem. 2015;87(8):4370-6.
- 737 57. Hattori M, Hibbs RE, Gouaux E. A fluorescence-detection size-exclusion chromatography-  
738 based thermostability assay for membrane protein precrystallization screening. Structure.  
739 2012;20(8):1293-9.
- 740 58. Miller PS, Scott S, Masiulis S, De Colibus L, Pardon E, Steyaert J, et al. Structural basis  
741 for GABAA receptor potentiation by neurosteroids. Nat Struct Mol Biol. 2017.
- 742 59. Matulef K, Valiyaveetil FI. Patch-Clamp Recordings of the KcsA K(+) Channel in  
743 Unilamellar Blisters. Methods Mol Biol. 2018;1684:181-91.
- 744 60. Bligh EG, Dyer WJ. A rapid method of total lipid extraction and purification. Can J Biochem  
745 Physiol. 1959;37(8):911-7.
- 746 61. de Jong DH, Singh G, Bennett WF, Arnarez C, Wassenaar TA, Schafer LV, et al. Improved  
747 Parameters for the Martini Coarse-Grained Protein Force Field. J Chem Theory Comput.  
748 2013;9(1):687-97.
- 749 62. Pan J, Chen Q, Willenbring D, Yoshida K, Tillman T, Kashlan OB, et al. Structure of the  
750 pentameric ligand-gated ion channel ELIC cocrystallized with its competitive antagonist  
751 acetylcholine. Nat Commun. 2012;3:714.
- 752 63. Van Der Spoel D, Lindahl E, Hess B, Groenhof G, Mark AE, Berendsen HJ. GROMACS:  
753 fast, flexible, and free. J Comput Chem. 2005;26(16):1701-18.
- 754 64. Periole X, Cavalli M, Marrink SJ, Ceruso MA. Combining an Elastic Network With a  
755 Coarse-Grained Molecular Force Field: Structure, Dynamics, and Intermolecular Recognition. J  
756 Chem Theory Comput. 2009;5(9):2531-43.
- 757

758  
759

### Supplementary Data

#### E coli

| PE        | m/z      | Intensity | Theo. Mass | Delta (mmu) | Composition    |
|-----------|----------|-----------|------------|-------------|----------------|
| 14:0/14:0 | 634.4453 | 2.30E+04  | 634.4453   | -0.07       | C33 H65 O8 N P |
| 14:0/16:0 | 662.4765 | 1.70E+05  | 662.4766   | -0.11       | C35 H69 O8 N P |
| 16:0/16:1 | 688.4922 | 1.80E+05  | 688.4923   | -0.06       | C37 H71 O8 N P |
| 16:0/16:0 | 690.5079 | 2.20E+06  | 690.5079   | -0.06       | C37 H73 O8 N P |
| 16:0/17:1 | 702.5079 | 1.20E+06  | 702.5079   | -0.06       | C38 H73 O8 N P |

| PG                      | m/z      | Intensity | Theo. Mass | Delta (mmu) | Composition   |
|-------------------------|----------|-----------|------------|-------------|---------------|
| 16:0/16:1               | 719.4868 | 2.60E+05  | 719.4869   | -0.09       | C38 H72 O10 P |
| 16:0/16:0               | 721.5024 | 4.80E+05  | 721.5025   | -0.07       | C38 H74 O10 P |
| 16:0/17:1               | 733.5024 | 1.20E+06  | 733.5025   | -0.14       | C39 H74 O10 P |
| 16:1/18:1;<br>17:1/17:1 | 745.5023 | 3.10E+05  | 745.5025   | -0.17       | C40 H74 O10 P |
| 16:0/18:1               | 747.518  | 4.80E+05  | 747.5182   | -0.21       | C40 H76 O10 P |
| 17:1/18:1               | 759.5181 | 3.30E+05  | 759.5182   | -0.05       | C41 H76 O10 P |
| 17:1/18:0;<br>17:0/18:1 | 761.5337 | 1.30E+06  | 761.5338   | -0.1        | C41 H78 O10 P |
| 18:0/18:2               | 773.5337 | 6.30E+05  | 773.5338   | -0.1        | C42 H78 O10 P |
| 18:1/19:1               | 787.5494 | 2.80E+05  | 787.5495   | -0.1        | C43 H80 O10 P |
| 19:1/19:1               | 801.5649 | 2.60E+05  | 801.5651   | -0.18       | C44 H82 O10 P |

#### ELIC

| PE        | m/z      | Intensity | Theo. Mass | Delta (mmu) | Composition    |
|-----------|----------|-----------|------------|-------------|----------------|
| 14:0/14:0 |          |           |            |             |                |
| 14:0/16:0 | 662.4769 | 9.30E+03  | 662.4766   | 0.3         | C35 H69 O8 N P |
| 16:0/16:1 | 688.4924 | 2.20E+04  | 688.4923   | 0.11        | C37 H71 O8 N P |
| 16:0/16:0 | 690.5078 | 8.30E+05  | 690.5079   | -0.12       | C37 H73 O8 N P |
| 16:0/17:1 | 702.5078 | 1.70E+05  | 702.5079   | -0.09       | C38 H73 O8 N P |

| PG                      | m/z      | Intensity | Theo. Mass | Delta (mmu) | Composition   |
|-------------------------|----------|-----------|------------|-------------|---------------|
| 16:0/16:1               | 719.4868 | 5.50E+04  | 719.4869   | -0.1        | C38 H72 O10 P |
| 16:0/16:0               | 721.5025 | 2.30E+05  | 721.5025   | -0.06       | C38 H74 O10 P |
| 16:0/17:1               | 733.5024 | 3.60E+05  | 733.5025   | -0.12       | C39 H74 O10 P |
| 16:1/18:1;<br>17:1/17:1 | 745.5024 | 1.80E+05  | 745.5025   | -0.14       | C40 H74 O10 P |
| 16:0/18:1               | 747.518  | 1.10E+05  | 747.5182   | -0.19       | C40 H76 O10 P |
| 17:1/18:1               | 759.5182 | 2.00E+06  | 759.5182   | 0.04        | C41 H76 O10 P |
| 17:1/18:0;<br>17:0/18:1 | 761.5338 | 4.00E+05  | 761.5338   | -0.04       | C41 H78 O10 P |
| 18:0/18:2               | 773.5338 | 3.20E+05  | 773.5338   | 0           | C42 H78 O10 P |

|                  |          |          |          |       |               |
|------------------|----------|----------|----------|-------|---------------|
| <b>18:1/19:1</b> | 787.5494 | 1.80E+05 | 787.5495 | -0.04 | C43 H80 O10 P |
| <b>19:1/19:1</b> | 801.5651 | 9.10E+04 | 801.5651 | -0.03 | C44 H82 O10 P |

760

761 **Supplementary Table 1:** Phosphatidylethanolamine and phosphatidylglycerol species identified

762 in lipid extracts by MS/MS. Table shows m/z, intensity, mass and mass accuracy of each

763 phospholipid species.



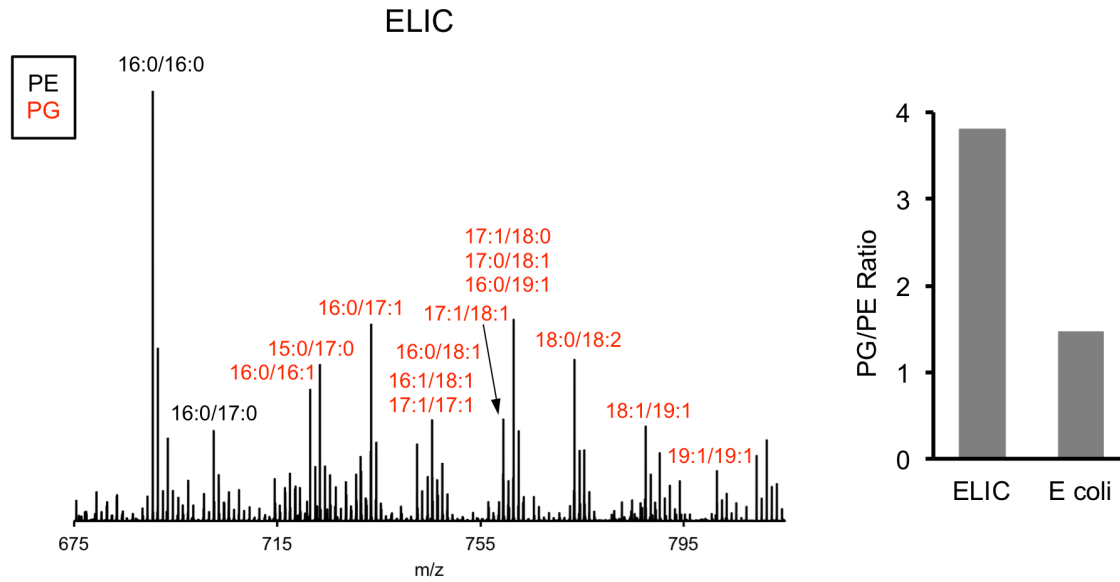

764

765 **Supplementary Fig 1.** MS1 spectra of lipid extract from purified ELIC in DDM and *E. coli*

766 membranes. Labeled peaks correspond to PG (red) and PE (black) phospholipids with specific

767 acyl chain combinations determined from MS2 fragmentation. *Right:* Graph shows quantification

768 of the intensity of all PG species relative to PE species for ELIC and *E. coli* membrane samples.

769

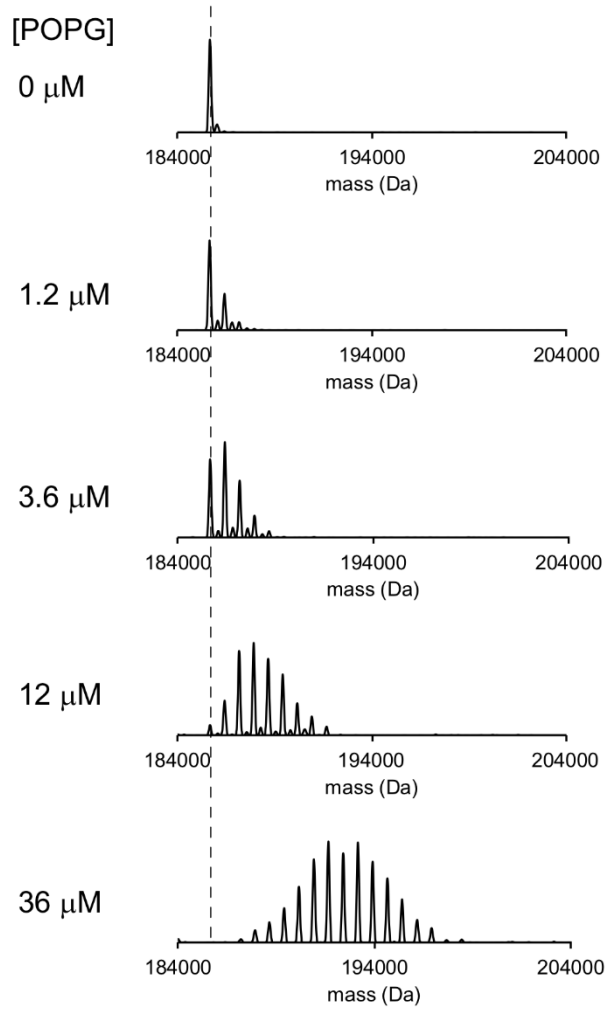

770

771 **Supplementary Fig. 2.** Representative deconvoluted spectra of 1  $\mu\text{M}$  ELIC in C10E5 with

772 increasing concentration of POPG. Dashed line indicates mass of apo ELIC.

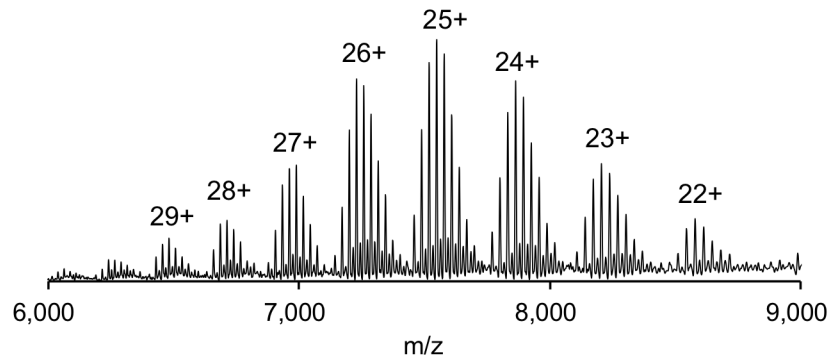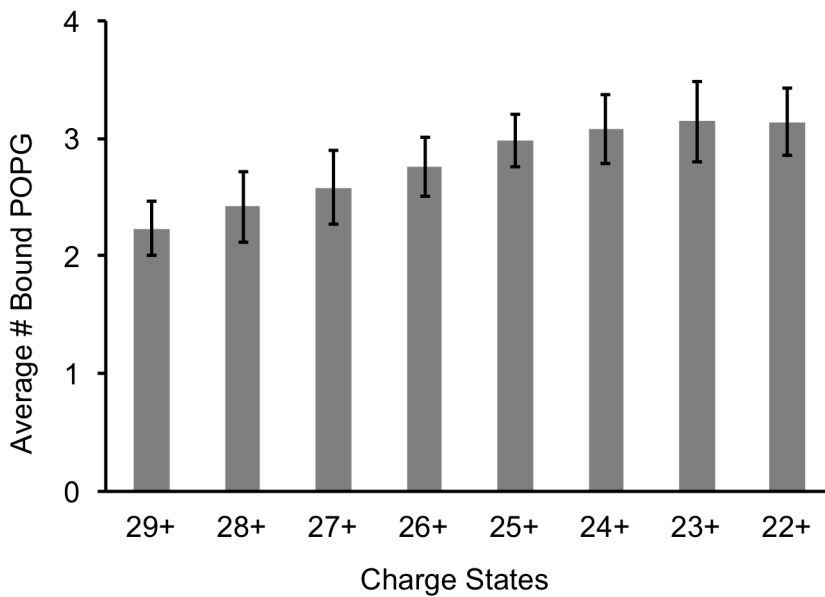

773

774 **Supplementary Fig. 3.** Comparison of lipid binding at different charge states. *Top:*

775 Representative full native spectrum of the ELIC pentamer with 12  $\mu$ M POPG with each charge

776 state labeled. *Bottom:* Quantification of the average number of bound POPG to the ELIC

777 pentamer at each charge state (n=13,  $\pm$ SD).

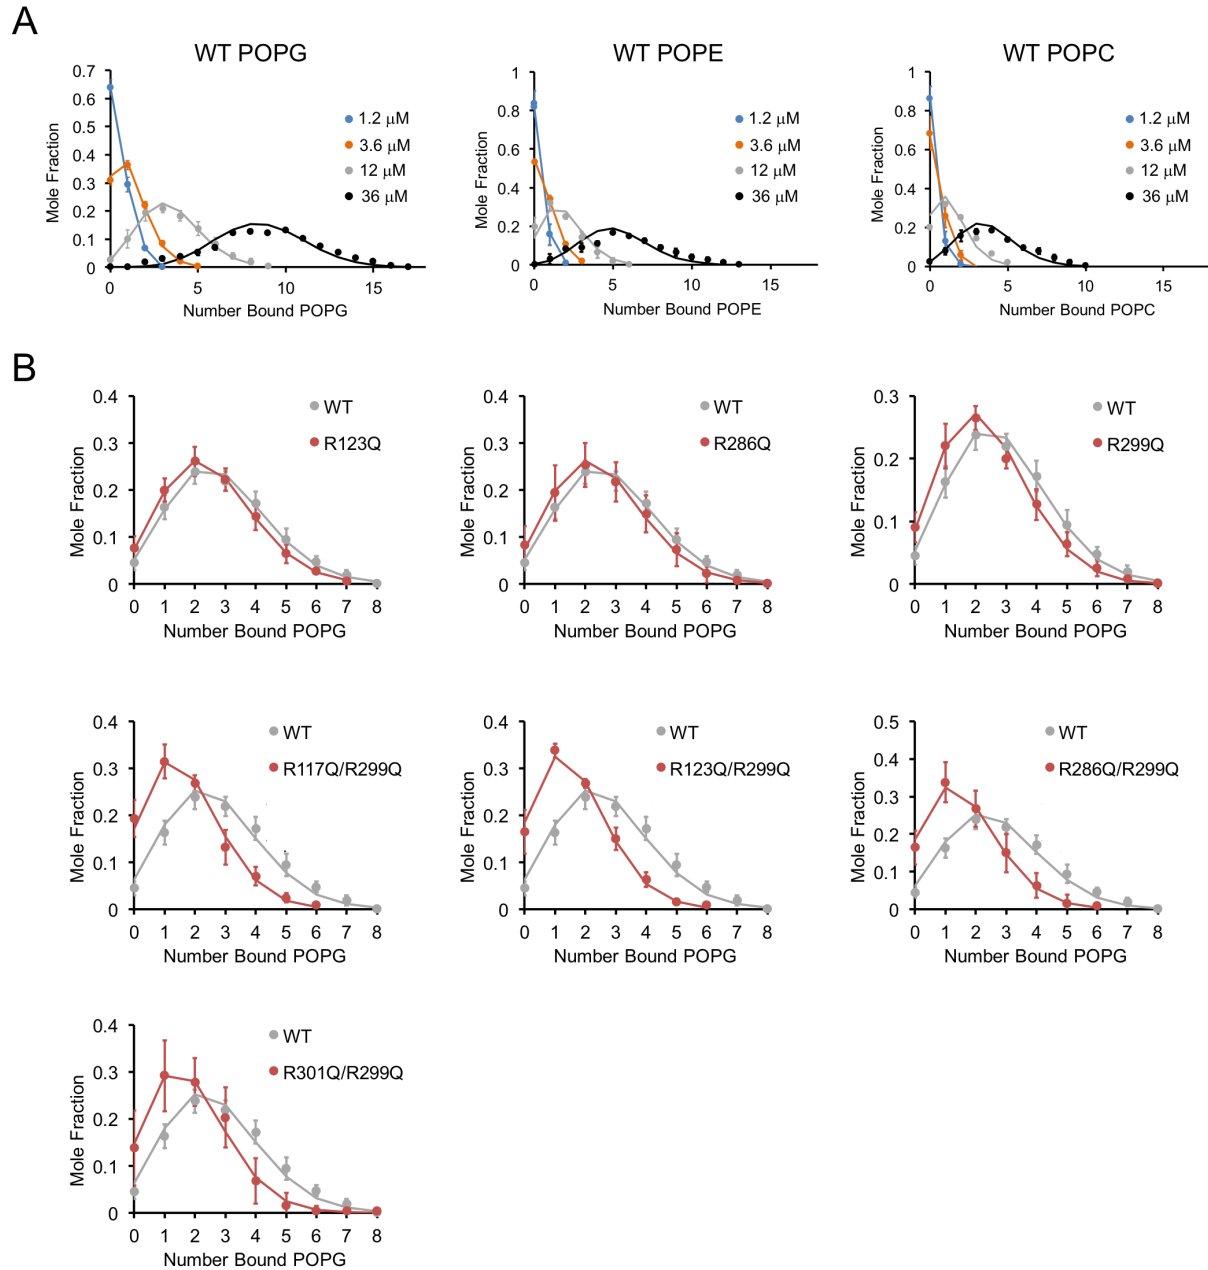

**C**

| ELIC                | WT   |      |      | R123Q | R286Q | R299Q | R117Q/<br>R299Q | R123Q/<br>R299Q | R286Q/<br>R299Q | R301Q/<br>R299Q |
|---------------------|------|------|------|-------|-------|-------|-----------------|-----------------|-----------------|-----------------|
|                     | POPG | POPE | POPC |       |       |       |                 |                 |                 |                 |
| K ( $\mu\text{M}$ ) | 101  | 190  | 280  | 101   | 101   | 101   | 101             | 101             | 101             | 101             |
| N (# sites)         | 32   | 32   | 32   | 28    | 28    | 27    | 20              | 18              | 18              | 21              |

778

779 **Supplementary Fig. 4.** Lipid binding data fit to binomial distributions. **(A)** Plots of mole fraction

780 of phospholipid-bound ELIC derived from native MS experiments with varying concentrations of

781 phospholipid (circles,  $n=3-6$ ,  $\pm$ SD). Solid lines show global fits from a binding model based on a  
782 binomial distribution with 32 sites (N) of equal affinity (K) using K as shown in (C). **(B)** Plots of  
783 mole fraction of POPG-bound ELIC WT and mutants at 12  $\mu$ M POPG (circles,  $n=3-6$ ,  $\pm$ SD). Solid  
784 lines show fits as in (A) in which K is held constant at 102  $\mu$ M and N is varied as indicated in (C).  
785 **(C)** Table showing dissociation constants (K) and number of sites (N) used in fits shown in (A)  
786 and (B).

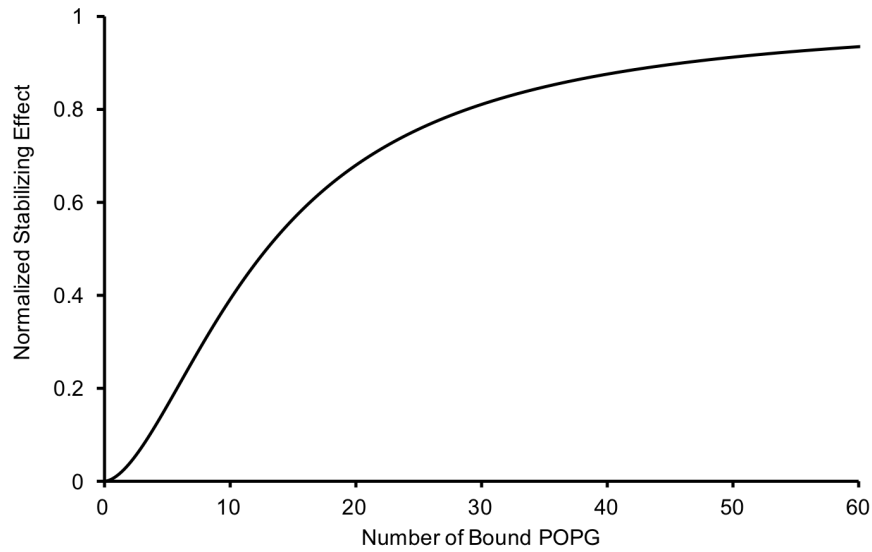

787

788 **Supplementary Fig. 5.** Relationship of the thermal stabilizing effect of POPG vs the average  
789 number of bound POPG derived from equating concentration of POPG from the sigmoid functions  
790 used to fit the POPG binding (Fig. 1B) and thermal stability data (Fig. 2A). The resulting

791 relationship is:  $S = \frac{1}{1+(13.7/P)^{1.7}}$ , where P is the average number of bound POPG and S is the

792 normalized thermal stabilizing effect.

## ELIC WT

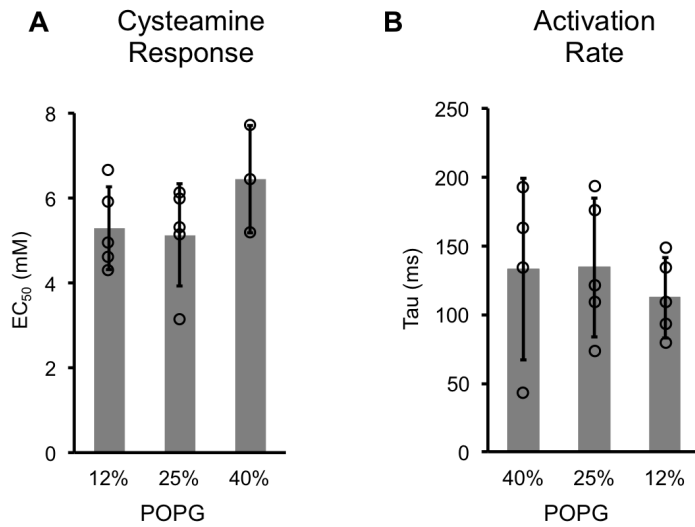

793

794 **Supplementary Fig. 6.** Channel properties of WT ELIC responses to cysteamine. (A) EC<sub>50</sub> for  
795 peak responses to cysteamine of WT ELIC in giant liposomes of varying mole% POPG (n=3-5,  
796 ±SD). (B) Activation time constants ( $\tau$ ) derived from single exponential fits of WT ELIC in response  
797 to 30 mM cysteamine in giant liposomes of varying mole% POPG (n=4-5, ±SD).



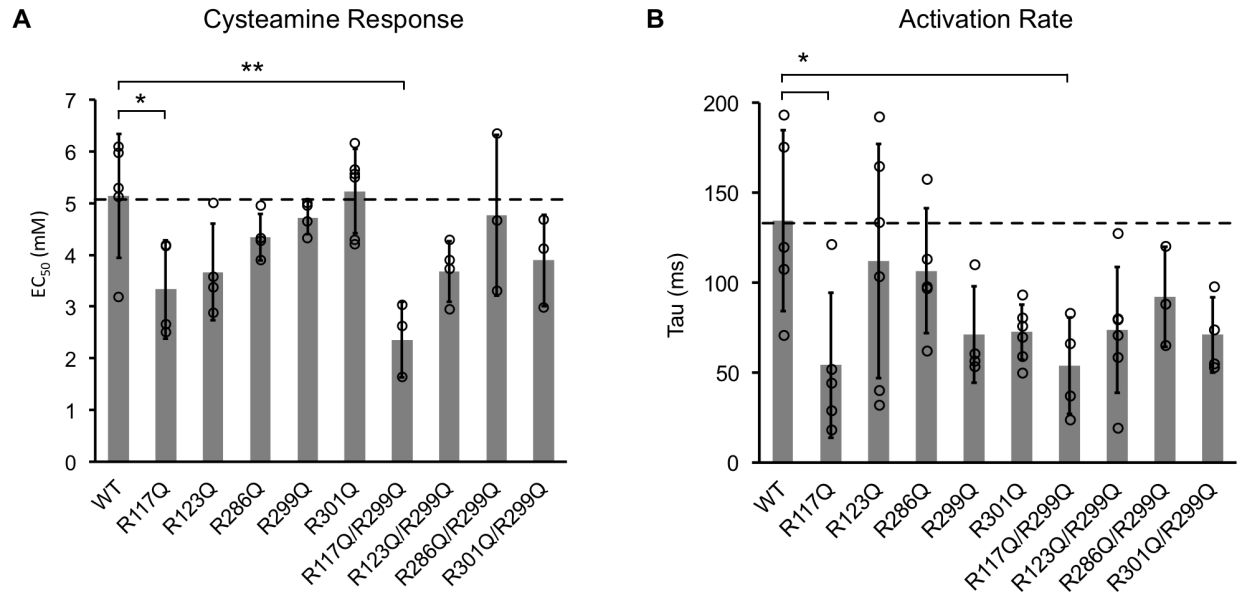

798

799 **Supplementary Fig. 7.** Channel properties of ELIC WT and mutant responses to cysteamine in  
800 giant liposomes of 25 mole% POPG. **(A)** Graph of EC<sub>50</sub> for peak responses to cysteamine of ELIC  
801 WT and mutants (n=4-7, ±SD, \*p<0.05, \*\*p<0.01). **(B)** Activation time constants (tau) of ELIC WT  
802 and mutants in response to 30 mM cysteamine (n=4-7, ±SD, \*p<0.05).
